14 **Abstract**

15 One striking feature of the large KRAB-containing zinc finger protein (KZFP) family  
16 is its rapid expansion and divergence since its formation about 400 million years ago.  
17 However, the evolutionary characteristics of KRAB domains, C2H2 zinc fingers and  
18 the full protein of KZFPs have not been fully analyzed. As for the drivers of the rapid  
19 evolution, it's partly due to their coevolution with transposable elements (TEs). But  
20 their diverse functions besides inhibiting TEs suggest other reasons exist. Here we  
21 address these two issues by the systematic analysis of the divergence time and  
22 diversification pattern of KZFPs at three aspects and the functional analysis of the  
23 potential target genes besides TEs. We found that old-zinc-finger-containing KZFPs  
24 tend to have varied and disordered KRAB domains, indicating there are two ways of  
25 the evolution of KZFPs, including the variation of KRAB domains and the  
26 diversification of zinc fingers. Among them, the divergence of zinc fingers mainly  
27 contributes to the rapid evolution of KZFPs. Thus, we mainly focused on the  
28 functional requirements of the evolution of zinc fingers. Different from the classical  
29 regulation pattern of this family, we found and experimentally confirmed that KZFPs  
30 tend to bind to non-TE regions and can positively regulate target genes. Although  
31 most young genes tend to be with a low expression level,  
32 young-zinc-finger-containing KZFPs tend to be highly expressed in early embryonic  
33 development or early mesoderm differentiation, indicating their particular  
34 evolutionarily novel functional roles in these two processes. We further validated a  
35 young KZFP, ZNF611, can bind to non-TE region of STK38 gene and positively  
36 regulates its expression in ESCs. The emergence of new sequence in STK38 promoter  
37 may drive the evolution of zinc fingers in ZNF611. Finally, we proposed a 'two-way  
38 evolution model' of KZFP family.

39 **Key words:** KZFP, evolutionary divergence time, target gene, non-TE, functional

40 constraint

41

## 42 **Introduction**

43 KRAB domain-containing zinc finger protein (KZFP) family, the largest family  
44 of transcription factors in mammalian (Nowick et al., 2011), has 363 member genes in  
45 human genome. Generally, KZFP contains a KRAB domain and a C-terminal C2H2  
46 zinc finger array with DNA-binding potential (supplementary fig. 1). Both C2H2 zinc  
47 finger and KRI (KRAB Interior) motif, which is the ancestor of KRAB domain (Birtle  
48 & Ponting, 2006), are old motifs, appearing widely across animals, plants and fungi.  
49 However, these two kinds of motifs did not appear in the same protein during the  
50 lengthy process of evolution until their ‘marriage’ in the last common ancestor of  
51 coelacanth and tetrapods (Imbeault, Helleboid, & Trono, 2017) about 400 million  
52 years ago. After that, the KZFP family expanded and diverged quickly especially  
53 during the evolution of mammalian.

54 The phenomena of the rapid evolution of KZFP family include three aspects: (1)  
55 The strong specificity of KZFP family across species. Lots of species-specific KZFP  
56 genes were reported in human, chimpanzee and other species (Huntley et al., 2006;  
57 Imbeault et al., 2017; Nowick et al., 2011; Thomas & Schneider, 2011). (2) The quick  
58 expansion of the number of KZFP member gene and C2H2 zinc finger motif in a  
59 KZFP. The number of KZFP genes (Emerson & Thomas, 2009; Looman, Abrink,  
60 Mark, & Hellman, 2002; Nowick et al., 2011) and the average zinc finger number per  
61 KZFP (Emerson & Thomas, 2009) in mammalian are much more than those in birds,  
62 reptiles and amphibians. (3) The rapid divergence of full protein sequence or C2H2  
63 zinc finger motif among KZFP orthologs. Some studies revealed that phylogenetically  
64 specific KZFP genes are under strong positive selection (Emerson & Thomas, 2009;  
65 Looman et al., 2002). The specificity of the binding sequence is depended mainly on  
66 three key amino acids within each zinc finger (at positions 6, 3 and -1 of the C2H2

67 helix) (supplementary fig. 1), and the amino acid at position 2 which contacts the  
68 secondary strand (Ecco, Imbeault, & Trono, 2017; Emerson & Thomas, 2009). It was  
69 revealed that the key amino acids in C2H2 zinc fingers were also of great diversity  
70 among different species (Emerson & Thomas, 2009; Hamilton et al., 2006; Imbeault  
71 et al., 2017). In a word, KZFP family expanded and diversified rapidly during the  
72 evolution of mammalian lineage.

73 There are numerous studies focusing on the causes about rapid evolution of  
74 KZFP family. The previous studies found that KZFP can inhibit endogenous  
75 retroelements during early embryonic development (G. Wolf et al., 2015) and  
76 embryonic stem cells (D. Wolf & Goff, 2009), even in adult tissues (Ecco et al., 2016).  
77 Furthermore, a lot of data indicated that there is a coevolution between zinc fingers in  
78 KZFP family and transposable elements (TEs) (Ecco et al., 2017; Jacobs et al., 2014;  
79 Thomas & Schneider, 2011). There are two co-evolution models: (1) the arms race  
80 model (Jacobs et al., 2014), in which KZFP proteins unremittingly suppress the  
81 invasion of rapidly mutating TEs via changing the key amino acids of zinc fingers;  
82 and (2) the domestication model (Ecco et al., 2017; Pontis et al., 2019), in which  
83 KZFPs regulate domestication of TEs instead of restraining the transposition potential  
84 of TEs. Thus, the regulation of TEs is an important driver for rapid evolution of the  
85 KZFP family. However, KZFPs also have many other functions besides repressing  
86 TEs (Baudat et al., 2010; Grey et al., 2011; Grey, Baudat, & de Massy, 2018; Guo et  
87 al., 2009; Kang et al., 2012; X. Li et al., 2008; Patel et al., 2018; Riso et al., 2016;  
88 Takahashi et al., 2019; D. Yang et al., 2013), suggesting the rapid evolution of zinc  
89 fingers in KZFP family may be also related to their special functions besides  
90 repressing TEs.

91 Here, we focused on the deep and systematic analysis of the evolutionary

92 characteristics of KZFP family and the reasons for the rapid evolution of this family.  
93 By identifying the evolutionary features of the KRAB domains, zinc fingers and the  
94 full protein of KZFPs, and analyzing the functions of target genes besides TEs, this  
95 study provides new understandings about the rapid evolution of KZFP family.

## 96 **Results**

### 97 **Comparison of the divergence time of the full sequence, KRAB domain and zinc** 98 **fingers in KZFPs**

99 In order to fully describe the evolutionary characteristics of KZFP family, the  
100 evolutionary divergence time of each member of the human KZFP family was  
101 calculated. For each KZFP, the full protein sequence, KRAB domain and the key  
102 amino acids of zinc fingers were searched for its orthologs across species and the  
103 divergence time was determined according to the last common ancestor of the species  
104 containing its orthologs (see Method section for detail). Then the distribution pattern  
105 of these three types of divergence time was explored. Firstly, by directly comparing  
106 the divergence time distribution of the three type of divergence times, we found that,  
107 in general, the divergence times of zinc fingers are significantly later than the other  
108 two types of divergence times (fig. 1A, supplementary fig. 2A). Subsequently, we  
109 compared the difference value of divergence time between any two types of  
110 divergence times of each KZFP. KRAB divergence time is much earlier than the  
111 divergence time of full protein sequence in 40.7% of KZFPs, and is later in 31.6% of  
112 KZFPs (fig. 1B). Zinc finger divergence time is later than the divergence time of full  
113 protein sequence in 49.0% of KZFPs and is later than KRAB domain divergence time  
114 in 59.1% of KZFPs. On contrast, the divergence time of zinc finger is earlier than the  
115 divergence time of full protein sequence only in 4.8% of KZFPs and is earlier than  
116 KRAB domain divergence time only in 10.2% of KZFPs. These results showed that

117 about half of KZFPs are much younger when they are evaluated by the divergence  
118 time of zinc fingers than by that of the full protein sequences or KRAB domains. The  
119 more newly emerged zinc fingers reveal that the rapid evolution of KZFPs in  
120 mammalian is mainly reflected in the rapid evolution of zinc fingers of them.

121 Interestingly, the three types of divergence time are all the most at the grade of  
122 Eutheria (105 million years ago, Mya). There are 133, 188, 155 KZFPs belonging to  
123 this grade of divergence time of the full protein sequence, KRAB domain and zinc  
124 finger respectively (supplementary fig. 2A&2B). Their intersection and union are 72  
125 and 258 respectively. This result indicates that there are a large number of KZFPs  
126 originating in the common ancestor of eutherians. This may be related to the special  
127 traits in this clade. Compared with the other mammals, such as marsupials and  
128 monotremes, eutherians have relatively long gestation periods during embryonic  
129 development (Behringer, Eakin, & Renfree, 2006), in which the KZFPs with the age  
130 of 'Eutheria' may play important roles (Nowick, Carneiro, & Faria, 2013).

### 131 **The diversification pattern of KRAB domains and zinc fingers in human**

132 The rapid and frequent divergence of the sequence of KZFPs led to the  
133 diversification of KZFP members in the current existing species. To characterize the  
134 outcome of the evolution of KZFP family in human genome, the diversification  
135 patterns of the KRAB domains and the key amino acids of zinc fingers were analyzed.  
136 Through multiple sequence alignment of all human KRAB-A box sequences, we  
137 found that a cluster of 35 KZFPs have variant KRAB domains compared with other  
138 KZFPs (fig. 2A). We then supposed that the KRAB domains of these 35 KZFPs may  
139 also have special structural characteristics. The structural disorder ratio of the KRAB  
140 domains was compared between these 35 KZFPs and others. As the result, these 35  
141 KRAB domains are significantly more disordered than the other 328 KRAB domains

142 (fig. 2B). Disordered protein domains tend to have diverse structural conformations,  
143 and then have diverse interacting partners and functions (Csizmok, Follis, Kriwacki,  
144 & Forman-Kay, 2016; Mosca, Pache, & Aloy, 2012). Thus, we inferred that the  
145 KRAB domains in this special cluster may have diverse interacting partners besides  
146 KAP-1, the universal and canonical partner of KRAB domain. This result is consistent  
147 with a previous study (Helleboid et al., 2019) which showed that the variant KRAB  
148 box may mediate non-canonical interactions. We further investigated the distribution  
149 of the divergence time of these 35 KRAB domains. Compared with all the human  
150 KRAB domains, these 35 KRAB domains tend to be old (Amniota – Mammalia) or  
151 young (Euarchontoglires – Catarrhini), but are under-represented in middle-aged  
152 class (Theria – Boreoeutheria) (fig. 2A, supplementary fig. 2C). Even so, the  
153 middle-aged KRAB domains still account for the largest proportion in this variant  
154 cluster. This phenomenon suggests that these variant KRAB domains were formed  
155 gradually, rather than concentrated in a specific period of evolution.

156 When the divergence time of zinc fingers was considered, among these 35  
157 KZFPs, 23 of them (65.7%) contain old zinc fingers (the divergence time is over 159  
158 Mya) (fig. 2A). If we calculated using the number of KZFPs containing old zinc  
159 fingers as the denominator, 67.6% (23/34) of KZFPs with old zinc fingers contain  
160 variant KRAB domains (fig. 2A). These two results revealed that there is a large  
161 intersection between the old-zinc-finger-containing KZFPs and the KZFPs with a  
162 variant KRAB domain. In other words, KZFPs with evolutionarily conserved zinc  
163 fingers tend to have a variant KRAB domain. This suggest there are two different  
164 ways for the evolution of KZFPs. One is the divergence of key amino acids in zinc  
165 fingers (that is, KZFPs containing young zinc fingers). 90% of the KRAB domains in



166 these KZFPs are completely structured (fig. 2C), suggesting that they have a single  
167 and unchangeable function execution pattern and constantly interact with a specific  
168 co-factor (such as KAP-1). In another evolutionary path, the key amino acids in the  
169 zinc fingers are conserved (that is, KZFPs containing old zinc fingers). However, the  
170 KRAB domains of these KZFPs are variable and tend to be disordered (fig 2C),  
171 suggesting that their KRAB domains are versatile, interacting with multiple proteins.

172 Besides KRAB domains, C2H2 zinc finger motifs and the non-domain regions of  
173 KZFPs with variant KRAB domains (supplementary fig. 3A-3C) or old zinc fingers  
174 (supplementary fig. 3D & 3E) are more disordered than those in other KZFPs  
175 (supplementary result). But after all, KZFPs with variant KRAB domains or old zinc  
176 fingers are only a small part. For the entire KZFP family, KRAB domains tend to be  
177 completely structured although they are absolutely young domains (supplementary fig.  
178 3F&3G; supplementary result). Furthermore, at protein level, KZFPs are also highly  
179 structured, suggesting that most of KZFPs are monotonous and unchangeable in  
180 structural conformation and functional mechanism (supplementary fig. 4;  
181 supplementary table 1; supplementary result).

182 In order to analyze the diversification pattern of zinc fingers in human, the  
183 similarity of zinc fingers based on three key amino acids within each zinc finger in  
184 human KZFPs were calculated. As the result, the similarity between most zinc finger  
185 pairs are very low (fig. 2D, supplementary table 2), only 153 (0.23%) KZFP pairs  
186 have similarity value over 0.6 (fig. 2E). Furthermore, by identifying the homologous  
187 relationship of human KZFPs, we found that only 121 (33.3%) KZFPs belong to 44  
188 paralogous gene groups, while 242 (66.7%) KZFPs are singletons (fig. 2F). These  
189 results indicate that the key amino acids in KZFP zinc fingers are diverse.

190 Overall, from the above results we can infer that the most remarkable

191 evolutionary characteristics of KZFPs are as follows: although there are two ways of  
192 evolution for this family, that is KRAB variation or zinc finger variation, most of  
193 KZFPs belong to the ‘zinc finger variation’ evolution class. These KZFPs have  
194 relatively young and diverse zinc fingers, suggesting their targeting sequences may  
195 also evolved quickly, which acted as drivers for the quick evolution of zinc fingers.

### 196 **KZFPs tend to bind to non-TE regions in exon and promoter**

197 In order to analyze the functional differences of KZFPs with different  
198 evolutionary features and explore the reasons for the rapid evolution of the KZFP  
199 family, the target gene information of KZFP should be investigated. To this end, we  
200 collected ChIP-seq or ChIP-exo data of 262 KZFPs (supplementary file). An  
201 important function of KZFPs is to bind and inhibit transposable elements (TEs),  
202 especially retroelements (Ecco et al., 2017; P. Yang, Wang, & Macfarlan, 2017), and  
203 there is a co-evolution model between KZFPs and TEs (Jacobs et al., 2014; Thomas &  
204 Schneider, 2011). To comprehensively analyze the genome-wide TE-binding tendency  
205 of KZFPs, we analyzed the KZFP binding sites in various regions of the genome. For  
206 a KZFP, if over half of the KZFP peaks binding to TEs in a region, the KZFP is  
207 identified as the KZFP tending to bind to TEs in this region and *vice versa*. Based on  
208 this standard, we found over half of KZFPs tend to bind to non-TE regions in genome  
209 (fig. 3A; supplementary table 3). And more interestingly, around 90% of KZFPs tend  
210 to bind to non-TE regions in exon, UTR and promoter (fig. 3A; supplementary table  
211 3). However, according to the result of two previous studies, KZFPs tend to bind to  
212 TEs in genome (Helleboid et al., 2019; Imbeault et al., 2017). We found that main  
213 reason for this difference is the different versions of MACS program used in the  
214 ChIP-seq data processing (supplementary results; supplementary table 4).  
215 Furthermore, we confirmed that MACS2 used in this study is more accurate than

216 MACS1.4 used in the previous studies (Helleboid et al., 2019; Imbeault et al., 2017),  
217 indicating that our conclusion that KZFP tend to bind to non-TE regions is valid  
218 (supplementary results; supplementary fig. 5).

219 Since there is a coevolution phenomenon between the zinc fingers of KZFP and  
220 the sequence of TE (Ecco et al., 2017; Jacobs et al., 2014; Thomas & Schneider, 2011),  
221 we assumed that there may be a tendency that KZFPs with younger zinc fingers may  
222 tend to bind to TEs. To test this speculation, we analyzed the binding bias of KZFPs  
223 with different zinc finger divergence times. Within the whole genome, it is obvious  
224 that KZFPs with younger zinc fingers tend to bind to TEs (fig. 3B & supplementary  
225 fig. 6).

226 We next sought to clarify the detailed functions of KZFPs which bind to non-TE  
227 regions. Based on KZFP ChIP-seq or ChIP-exo data, all of the PCGs were classified  
228 into three categories: noKZFP\_PCGs, KZFP-TE\_PCGs and KZFP-nonTE\_PCGs (fig.  
229 3C). We found that the biological functions of these three types of PCGs were obvious  
230 different. Interestingly, the development related processes were specifically  
231 over-represented in KZFP-nonTE\_PCGs (fig. 4D), and KZFP-TE\_PCGs were with  
232 higher tolerance to functional variations than KZFP-nonTE\_PCGs (fig. 3E). Moreover,  
233 KZFP-TE\_PCGs and KZFP-nonTE\_PCGs are under higher purifying selection  
234 pressure than noKZFP\_PCGs (fig. 4F). These results revealed that  
235 KZFP-nonTE\_PCGs are of greatest functional essentiality among the three types of  
236 PCGs, indicating the functions regulated by KZFPs via binding to non-TE regions are  
237 very important.

238 **KZFP genes encoding young zinc fingers tend to have higher expression level in**  
239 **early embryonic development and the ESC differentiation into mesoderm**

240 The preceding analyses are not related to the expression of KZFPs in certain

241 spatio-temporal states. The investigation of the expression level of KZFPs in different  
242 spatio-temporal states is of great importance to understand their functions. In general,  
243 old genes often have higher expression level than young genes (Cardoso-Moreira et  
244 al., 2019). To verify whether the divergence time of the KZFP genes is correlated to  
245 their expression level, we explored the relationship between the evolutionary  
246 divergence time (full protein divergence time, KRAB domain divergence time and  
247 zinc finger divergence time) and gene expression level. Full protein divergence time is  
248 positively correlated with gene expression level for both TFs and other PCGs in  
249 almost all samples, and for C2H2-ZFPs in part of samples. However, this correlation  
250 for KZFPs was not significant in all samples. Interestingly, there was a negative  
251 correlation between zinc finger divergence time and expression level of KZFPs in  
252 early embryonic development and early mesoderm differentiation (fig. 4A;  
253 supplementary table 5), such as ZNF90, ZNF611 and ZNF814 (fig. 4B). In other  
254 words, in these samples, KZFPs with young zinc fingers have higher gene expression  
255 level, suggesting that younger-zinc-finger-containing KZFPs may play important roles  
256 in early embryonic development and early mesoderm differentiation.

### 257 **KZFPs can positively regulate target genes by binding to non-TE regions in** 258 **endoderm or mesoderm differentiation**

259 The data of chromatin accessibility, such as ATAC-seq data, can improve the  
260 predictability of *in vivo* transcription factor (TF) binding sites (Keilwagen, Posch, &  
261 Grau, 2019; H. Li, Quang, & Guan, 2019). Since transcription activators  
262 predominantly bound in accessible chromatin (Thurman et al., 2012), ATAC-seq data  
263 was mainly used for the prediction of TF binding sites mediating positive regulation.  
264 Interestingly, the peaks of KZFP ChIP-seq overlapping with non-TE regions were  
265 more likely to exist in open chromatin region in ESC than those overlapping with TEs

266 (fig. 5A).

267 In order to obtain high-credibility target genes of KZFPs, gene expression data  
268 (RNA-seq), ChIP-seq, ChIP-exo and ATAC-seq data were combined together to  
269 screen the target genes positively regulated by KZFPs in endoderm or mesoderm  
270 differentiation (fig. 5B). In total, we screened 4,116 target genes positively regulated  
271 by 112 KZFPs during ESCs differentiation to endoderm, and 2,490 target genes  
272 positively regulated by 76 KZFPs during ESCs differentiation to mesoderm. Of the  
273 two target gene sets mentioned above, 86.1 % and 83.8 % are KZFP-nonTE PCGs  
274 respectively. To verify the reliability of this prediction, ZNF202, ZNF383 and  
275 ZNF589 from endoderm differentiation and ZFP14, ZNF554 and ZNF565 from  
276 mesoderm differentiation were randomly chosen for the experimental validation.  
277 Interestingly, they positively regulated their target genes in ESCs but not in HEK293T  
278 cells (supplementary fig. 7A-7E; supplementary results). This could be further  
279 confirmed by the status of chromatin accessibility of the target genes in these two cell  
280 lines (supplementary fig. 7F; supplementary results). Further analysis of binding sites  
281 of 262 KZFPs in ESCs and HEK293T cells, we also found that many regions bound  
282 by KZFPs are in accessible chromatin in ESCs, while in HEK293T cells they are in  
283 inaccessible chromatin (supplementary fig. 8). These results indicated that KZFPs can  
284 play positive regulatory roles in particular biological states.

285 According to the traditional understanding of KZFP functions, most of KZFPs  
286 silenced TEs and also repressed the neighboring gene expression at TEs (Jacobs et al.,  
287 2014; Oleksiewicz et al., 2017; P. Yang et al., 2017). Previously, some studies also  
288 found that part of KZFPs can positively regulate target genes. For example, Schmitges  
289 *et al.* found 31 KZFPs can interact with at least one activator and it was further  
290 confirmed that ZNF554 can positively regulate the expression of target genes

291 (Schmitges et al., 2016). Chen *et al.* found that ZFP30 positively regulated the target  
292 genes by binding to TE-derived enhancers (Chen et al., 2019). However, it is still  
293 unclear whether KZFPs may play positive regulatory roles by binding to non-TE  
294 regions. Here, we firstly report that there are a large number of target genes positively  
295 regulated by KZFPs via binding to non-TE regions in certain spatiotemporal states.  
296 These new findings expand our understanding of the functional characteristics of the  
297 KZFP family.

298 To understand the detailed functions of target genes positively regulated by  
299 KZFPs, we analyzed the regulatory functions of KZFP-TE\_PCGs and  
300 KZFP-nonTE\_PCGs in these two differentiation processes. Interestingly, we found  
301 KZFP-nonTE\_PCGs specifically tend to participate in the functions closely related to  
302 the development of corresponding embryo layer in both endoderm differentiation and  
303 mesoderm differentiation, such as pharyngeal system development (supplementary fig.  
304 9A) and heart development (fig. 5C). These results indicate that KZFPs play  
305 important roles in the differentiation of ESCs to endoderm or mesoderm via  
306 regulating target genes by binding to non-TE regions.

307 From the perspective of functional essentiality, KZFP-TE\_PCGs have higher  
308 tolerance than KZFP-nonTE\_PCGs in both differentiation of endoderm  
309 (supplementary fig. 9B) and mesoderm (fig. 5D). Moreover, KZFP-TE\_PCGs are  
310 under lower purifying selection pressure than KZFP-nonTE\_PCGs in endoderm  
311 differentiation (supplementary fig. 9C), while there is no significant difference in  
312 mesoderm differentiation (fig. 5E). These results further confirmed that  
313 KZFP-nonTE\_PCGs are under stronger functional constraint and selection pressure,  
314 consistently indicating that binding to the non-TE regions in promoters is an  
315 important regulatory mechanism for KZFPs and the target genes that regulated by

316 KZFPs binding to non-TE regions are more essential.

317 **The emergence of new sequence in STK38 promoter may drive the evolution of**  
318 **zinc fingers in ZNF611**

319 As described in the preceding section, some KZFPs containing young zinc  
320 fingers highly expressed in early mesoderm differentiation (fig. 4). To validate the  
321 functional roles of these young-zinc-finger-containing KZFPs in mesoderm  
322 differentiation, the key KZFPs that may play important roles were selected and the  
323 validation experiments were conducted. Combined zinc finger divergence time, gene  
324 expression in mesoderm differentiation and the known functional annotations of  
325 KZFP target genes, ZNF611 and its target genes bone morphogenetic protein receptor,  
326 type II (BMPR2) and serine/threonine kinase 38 (STK38) were selected to do the  
327 validation experiments. BMPR2 is a transmembrane serine/threonine kinase that binds  
328 BMP2 and BMP7 in association with multiple type I receptors, including  
329 BMPR-IA/Brk1, BMPR-IB, and ActR-I (Liu, Ventura, Doody, & Massague, 1995).  
330 STK38 is a member of the protein kinase A (PKA)/PKG/PKC-like family, and STK38  
331 can negative regulate of MEKK1/2 signaling (Enomoto et al., 2008). Both BMPR2  
332 and STK38 are important in mesoderm differentiation, so we assumed that ZNF611 is  
333 involved in mesoderm differentiation by positively regulating BMPR2 and STK38. To  
334 test the hypothesis, we first examined the effect of ZNF611's expression level on the  
335 mRNA level of BMPR2 and STK38 using quantitative PCR. The overexpression of  
336 ZNF611 in the ESC cells increased the mRNA level of *STK38* (fig. 6A). Similarly,  
337 when ZNF611 was knockdown with two different siRNA sequences, the mRNA level  
338 of *STK38* was decreased as well (fig. 6B).

339 Furthermore, we want to predict and verify the binding site of ZNF611 in the  
340 promoter of *STK38* gene. According to ChIP-seq data, ZNF611 can bind to non-TE

341 region in 5' UTR of STK38 (fig. 6C). ChIP-qPCR analysis was conducted to  
342 examining the binding of ZNF611 in non-TE region in 5' UTR of STK38. We  
343 overexpressed the flag-tagged ZNF611 and observed an enrichment of non-TE region  
344 in 5' UTR of STK38 in ChIPs by using flag antibodies (fig. 6D). These observations  
345 indicated that ZNF611 indeed binds to non-TE region in 5' UTR of STK38 and  
346 positively regulates STK38 in ESCs, suggesting that ZNF611 can regulate the  
347 differentiation of ESC into mesoderm by positively regulating STK38.

348 We next explored whether the binding sequence in STK38 promoter drives the  
349 evolution of key amino acids in zinc fingers of ZNF611. To this end, we collected the  
350 key amino acids in the zinc fingers of ZNF611 and other KZFPs in the cluster  
351 produced by Imbeault *et al.* (Imbeault et al., 2017). Then the sequences of key amino  
352 acids were aligned and the phylogeny tree was generated (fig. 6E). We can see that the  
353 key amino acids of ZNF611 are similar with other homologous KZFPs within  
354 Catarrhini instead of other Simiiformes, consistent with the zinc finger divergence  
355 time determined by Imbeault *et al.* (Imbeault et al., 2017). We predicted the ZNF611  
356 binding motif by RACDE (Najafabadi, Albu, & Hughes, 2015) and found that there  
357 was a binding sequence of ZNF611 in 5' UTR of STK38 (fig. 6F). Based on the  
358 alignment of the STK38 promoter locus from 21 representative species, we found the  
359 ZNF611 binding site in STK38 are highly conserved in Simiiformes (fig. 6G). To  
360 further verify the accuracy of the ZNF611 binding site, we cloned a ~1.2-kb DNA  
361 fragment upstream of the STK38 transcription start site (TSS) into a pGL3-basic  
362 luciferase vector (termed pGL3-STK38-P), containing the described ZNF611 binding  
363 motif. We also generated deletion lacking the ZNF611 binding motif  
364 (pGL3-STK38- $\Delta$ P) (fig. 6H). The ZNF611 overexpression dose-dependently  
365 increased the luciferase activity of pGL3-STK38-P, but not the pGL3-STK38- $\Delta$ P



366 reporter (fig. 6I). These results suggested there was a co-evolution between the  
367 binding sequence in the 5'UTR of STK38 and the zinc fingers of ZNF611: The new  
368 sequence in STK38 appeared in the common ancestor of simiiformes, and then (about  
369 14 million years later) the zinc fingers of ZNF611 evolved to adapt to the emergence  
370 of the new sequence. Therefore, there was a change in key amino acids in zinc fingers  
371 of ZNF611 in the common ancestor of catarrhini.

## 372 **Discussion**

373 In this study, we tried to comprehensively characterize the evolutionary features  
374 of KZFPs by the analysis of the divergence time and diversification pattern of KRAB  
375 domains, zinc fingers and the full protein of KZFPs. We then explored the functional  
376 features of the target genes of KZFPs with different ages, so as to answer the question  
377 why KZFP family evolved so fast. We found that: (1) the rapid evolution of KZFPs in  
378 mammalian is mainly reflected in the rapid evolution of zinc fingers of them. (2)  
379 KZFPs with old zinc fingers contain variable and disordered KRAB domains. (3)  
380 Different with the previous conclusions (Helleboid et al., 2019; Imbeault et al., 2017),  
381 KZFPs tend to bind to non-TE regions, instead of TEs, particularly in exons, and  
382 promoters. (4) Different from the classical repression function of KZFPs, we found  
383 that, in certain processes, such as ESC differentiation, lots of KZFPs can positively  
384 regulate target genes via binding to non-TE regions. (5) Some young  
385 zinc-finger-containing KZFPs (e.g. ZNF611) are highly expressed in early embryonic  
386 development and early mesoderm differentiation. After experimental verification, we  
387 found ZNF611, which contains young zinc fingers, binds to non-TE region in 5' UTR  
388 of STK38 and positively regulates its expression in ESCs, and importantly, the  
389 emergence of new sequence in STK38 promoter may drive the evolution of zinc  
390 fingers in ZNF611. These results indicate that the KZFPs containing young zinc

391 fingers can positively regulate genes and play important roles in the differentiation of  
392 ESC into mesoderm by binding to non-TE regions, suggesting that the function of  
393 binding to non-TE regions may be one of the drivers for rapid evolution of zinc  
394 fingers in KZFPs. Moreover, STK38 was up-regulated in differentiation of human  
395 ESCs into mesoderm, while Stk38 was down-regulated in differentiation of mouse  
396 ESCs into mesoderm (supplementary fig. 10), suggesting that there is a new  
397 regulation (that is, positively regulated by ZNF611) of STK38 in differentiation of  
398 human ESCs into mesoderm. Overall, these findings show that binding to non-TE  
399 regions is one of the important ways for KZFPs to greatly contribute to the formation  
400 and evolution of gene regulatory networks.

401 Based on our results, combining with the conclusions of existing researches  
402 (Ecco et al., 2017; Helleboid et al., 2019), we proposed a new KZFP family evolution  
403 model: ‘two-way evolution model’ (fig. 7). The evolution of the KZFP family mainly  
404 includes two directions. One is the divergence of key amino acids in zinc fingers (that  
405 is, KZFPs containing young zinc fingers), adapting to the changes of the target sites  
406 (such as TEs reported in previous studies, or non-TE regions revealed by this study).  
407 Almost all of the KRAB domains in these KZFPs are completely structured and the  
408 whole protein of these KZFPs also are relatively highly structured, suggesting that  
409 they have a single and unchangeable function execution pattern and constantly  
410 interact with a specific co-factor (such as KAP-1). In another evolutionary path, the  
411 key amino acids in the zinc fingers are conserved (that is, KZFPs containing old zinc  
412 fingers), and their target sites are also conserved. However, the KRAB domains of  
413 these KZFPs are variable and tend to be disordered, suggesting that their KRAB  
414 domains are versatile, interacting with multiple proteins. Therefore, these KZFPs can  
415 play diverse roles.

## 416 **Materials and Methods**

### 417 **The identification of members in KZFP family, C2H2-ZFP proteins and TFs in**

#### 418 *Homo Sapiens*

419 The *homo sapiens* protein sequences were downloaded from Ensembl release 83  
420 (Zerbino et al., 2018), and the HMM file of KRAB domain and zf-C2H2 domain were  
421 download from Pfam v29.0 (Finn et al., 2010). The KZFPs and C2H2-ZFPs were  
422 filtered using HMMER v3.1b2 (Eddy, 2009). The validation of transcription factors  
423 was based on DBD (DNA-binding domain) transcription factor database  
424 (Kummerfeld & Teichmann, 2006) and Ref. (Ravasi et al., 2010).

### 425 **The definition of the divergence time of the full protein sequence, KRAB domain** 426 **and zinc finger of KZFPs**

427 The divergence time of the full protein sequence was inferred according to the  
428 homology information from Ensembl Compara (Herrero et al., 2016; Vilella et al.,  
429 2009). To identify the divergence time of KRAB domain in human KZFPs, protein  
430 sequences of 80 species from 80 genera in deuterostomia were downloaded from  
431 Ensembl database (supplementary table 6). KRAB domains in 80 species were  
432 identified by HMMER v3.1b2 (Eddy, 2009). BLSATP was used to calculate the  
433 homology between human KRAB domains and KRAB domains in other 79 species.  
434 The hits with the identity and the percentage of the matched sequence in query or  
435 subject sequence above 80% were selected as homologous KRAB domains. The  
436 KRAB domain divergence time of each human KZFP was determined based on the  
437 species with farthest evolutionary distance from human in all species containing the  
438 homologous KRAB domains. The divergence times of KZFP zinc finger were inferred  
439 according to the similarity between the key amino acids in zinc-fingers (Imbeault et  
440 al., 2017). Evolutionary distance between *Homo Sapiens* and other 79 species were

441 estimated by TimeTree (Kumar, Stecher, Suleski, & Hedges, 2017). The divergence  
442 time values of full protein sequence, KRAB domain and zinc fingers of KZFPs are  
443 available in supplementary table 7.

#### 444 **The phylogenetic analysis**

445 Sequence alignments were performed using ClustalX (version 2.1) with default  
446 parameters (Larkin et al., 2007), and the phylogenetic tree (neighbor-joining tree) was  
447 constructed using MEGAX (Kumar, Stecher, Li, Knyaz, & Tamura, 2018) with  
448 default parameters.

#### 449 **The zinc finger similarity between each KZFP pairs in *Homo Sapiens***

450 The zinc finger similarity between each KZFP pairs was calculated according to the  
451 method described previously (Imbeault et al., 2017). Briefly, similarity between two  
452 zinc finger arrays was defined as sharing the same three amino acids at the  
453 DNA-contacting residues, allowing up to one replacement by a related amino acid (as  
454 defined by Blosum62). To identify paralogs of human KZFPs based on zinc fingers: 1)  
455 for the KZFP which containing 5 or more zinc fingers, the threshold similarity score  
456 of 60% and common zinc-fingers of 5 between any two zinc-finger arrays were  
457 selected; for the KZFP which containing 4 or less zinc fingers, a threshold similarity  
458 score of 100% between any two zinc-finger arrays was selected.

#### 459 **The disorder scores of proteins and domains**

460 *Structural disorder ration (SDR)*: The longest protein encoded by each gene was  
461 selected as the representative protein for subsequent analyses. IUPred (Dosztanyi,  
462 2018) was used to obtain the disorder score of each amino acid in a protein or domain.  
463 The disorder rate of a protein is the ratio of the number of disordered amino acids (the  
464 disorder score is greater than 0.5) to the total number of amino acids. According to  
465 SDR values, proteins can be divided into four classes: completely structured (SDR =

466 0), highly structured ( $0 < \text{SDR} \leq 10\%$ ), relatively disordered ( $10\% < \text{SDR} \leq 30\%$ ),  
467 and highly disordered ( $30\% < \text{SDR} \leq 100\%$ ).

468 *Consecutively disordered region number (CDRN)*: 1) for the domains or proteins  
469 which are longer than 50 aa, a CDR consists of 20 or more consecutively disordered  
470 amino acids; 2) for the domains which are shorter than 50 aa, a region containing  
471 consecutively disordered residues exceeding 40% of all domain residues is considered  
472 to be a CDR.

#### 473 **RNA-Seq data analysis.**

474 The RNA-Seq data was downloaded from GEO and ArrayExpress database  
475 (Supplementary file 1). The reads were mapped to the human genome build GRCh38  
476 (hg38) using Salmon v0.11.0 (Patro, Duggal, Love, Irizarry, & Kingsford, 2017).  
477 Isoform expression levels were calculated as transcripts per kilobase of exon model  
478 per million mapped reads (TPMs) and read counts using Salmon v0.11.0 (Patro et al.,  
479 2017), and gene expression levels were calculated by tximport (Soneson, Love, &  
480 Robinson, 2015).

#### 481 **ChIP-seq, ChIP-exo and ATAC-seq data analysis.**

482 The ChIP-seq, ChIP-exo and ATAC-seq data was downloaded from GEO DataSets  
483 and ENCODE (Consortium, 2012) (Supplementary file 1). The reads were mapped to  
484 the human genome build GRCh38 using HISAT2 (Kim, Langmead, & Salzberg,  
485 2015). Duplicate reads, which often represent PCR amplification artifacts, were  
486 removed using SAMtools version 1.3. We used MACS version 2.1.0 (Feng, Liu, Qin,  
487 Zhang, & Liu, 2012; Zhang et al., 2008) with the 'keep-dup all' parameter, which is  
488 recommended for ChIP-exo as genuine reads can accumulate on a few positions  
489 following exonuclease digestion (Imbeault et al., 2017). We filtered out peaks that  
490 would meet any of these criteria:  $P < 1 \times 10^{-16}$ . The transcription start sites (TSSs) were

491 retrieved from Ensembl release 83. The region from +2,000 bp to -500 bp of their  
492 nearest TSS were annotated as promoters (Tsankov et al., 2015). The genes whose  
493 promoters were overlapped with KZFP peaks were considered to be potential KZFP  
494 target genes.

#### 495 **TE information**

496 The TEs were obtained with the RepeatMasker track (Smit, AFA, Hubley, R and  
497 Green, P. RepeatMasker Open-3.0.1996–2010 <http://www.repeatmasker.org>) (Jurka,  
498 2000) from the hg 19 and hg38 genome assembly.

#### 499 **Screening process of KZFP target genes**

500 If the promoter region of a PCG is bound by a KZFP, the PCG is considered as a  
501 possible target gene of the KZFP. Genes which were expressed at least in one stage  
502 (ESC, endoderm or mesoderm) were included in the following analysis. Differentially  
503 expressed genes from ESCs to endoderm or mesoderm were screened according to the  
504 fold changes in four data sets (up-regulated trend: The fold change is greater than 1.1  
505 at least in three data sets; down-regulated trend: The fold change is less than 0.91 at  
506 least in three data sets). Chromatin accessibility data in ESCs, endoderm and  
507 mesoderm were used to filtrate the KZFP target genes: 1) if a KZFP peak bind to a  
508 promoter of PCG with accessible chromatin in both ESC and endoderm or mesoderm,  
509 the expression trend between KZFP gene and PCG should be same; 2) if a KZFP peak  
510 bind to a promoter of PCG with accessible chromatin only in ESC, both KZFP gene  
511 and PCG should be down-regulated; 3) if a KZFP peak bind to a promoter of PCG  
512 with accessible chromatin only in endoderm or mesoderm, both KZFP gene and PCG  
513 should be up-regulated. The potential target genes of KZFPs in differentiation from  
514 ESCs to endoderm or mesoderm were listed in supplementary table 8.

#### 515 **The over- or under-representation analysis**

516 This was performed using the method as previously described (D. Yang et al., 2012).  
517 Briefly, we first selected genes with BP term annotations. Subsequently, we filtered  
518 genes expressed during the differentiation of ESC into endoderm or mesoderm as the  
519 background. To analyse the over- or under-representation strengths of genes in each  
520 class relative to the background, we used the method based on hypergeometric  
521 distribution. The over- or under-representation strengths of each class were  
522 represented by  $-\log(p)$  or  $\log(p)$ .

### 523 **Retrieving the metrics of functional constraint and evolutionary rate** 524 **measurements**

525 We characterized KZFP target genes using three different measurements of functional  
526 constraint: (1) the residual variation intolerance score (RVIS); (2) the probability of  
527 being intolerant to loss-of-function mutations (pLI); and (3) the selection against  
528 heterozygous loss of gene function ( $S_{\text{het}}$ ). We obtained the pLI and RVIS percentile  
529 from Ref.(Dickinson et al., 2016) and  $S_{\text{het}}$  scores from Ref.(Cassa et al., 2017). The  
530 number of synonymous substitutions per synonymous site (dS) and the number of  
531 nonsynonymous substitutions per nonsynonymous site (dN) between the ortholog  
532 pairs of human and chimpanzee were retrieved using BioMart from Ensembl database  
533 (Kinsella et al., 2011).

### 534 **Plasmids and siRNA**

535 ZNF611 mammalian expression vector were constructed by PCR, followed by  
536 subcloning into pFLAG-CMV-2 (Sigma). The siRNA was purchased from Gene  
537 Pharma (Suzhou, China), and the following sequences were used. siZNF611-1: 5'-  
538 GCAGGUCAUCCCUUCAUGTT-3', siZNF611-2, 5'-  
539 GUGUAAUUCACUCCUGUCATT -3'. non-targeting siRNA, 5'-  
540 CCAUGUGAACUGGUCACUTT -3'.

## 541 **Cell culture and transfections**

542 The HEK293T cells were maintained in DMEM supplemented with 10% fetal  
543 bovine serum (Zhejiang Tianhang Biotechnology, Hangzhou, China).

544 The human ESC line H9 was cultured following the protocols as previously  
545 described (Ludwig et al., 2006). Briefly, H9 cells were plated as clumps in feeder-free  
546 conditions in six-well plates (Corning) coated with Matrigel (1: 80, BD Biosciences)  
547 in mTESR1 medium (Stem Cell Technologies). Gentle Cell Dissociation Reagent  
548 (STEMCELL Technologies) was used for passaging (1: 4-1: 7) every 4-7 days when  
549 cells reached 70-80% confluency on Matrigel. The differentiated cell clumps were  
550 manually removed before passaging to ensure high quality cultures.

551 When H9 cells reached 70 - 80 % confluency, the clumps were digested into  
552 single cells for optimal transfection efficacy. Cells were grown on 12-well plates  
553 coated with Matrigel. Single-cell passaging medium by adding Y-27632 (10  $\mu$ M,  
554 Stem Cell Technologies) to mTeSR1 was used for the 1st day of feeder-free culture  
555 (Watanabe et al., 2007). Before the transfection, the differentiated cells were  
556 manually removed.

557 Both HEK293T cells and H9 human ESCs were transfected with Lipofectamine  
558 2000 (Invitrogen, CA, USA) according to the manufacturer's instructions.

## 559 **Quantitative PCR**

560 Total RNA was isolated using Trizol kit (T9424, Sigma-Aldrich). Complementary  
561 DNA was synthesized using the cDNA synthesis kit (FSQ-101, TOYOTO, Osaka,  
562 Japan) according to the manufacturer's instructions. Fluorescence real-time RT-PCR  
563 was performed using the KAPA SYBR® Faster Universal (KK4601, Biocompare,  
564 South San Francisco, CA, USA) and the ABI PRISM 7300 system (Perkin-Elmer,  
565 Torrance, CA). PCR was conducted in triplicates and standard deviations representing



566 experimental errors were calculated. All data were analyzed using the ABI PRISM  
567 SDS 2.0 software (Perkin-Elmer). The expression of genes was normalized to the  
568 GAPDH gene. The PCR primers were listed in supplementary file 1.

#### 569 **Chromatin immunoprecipitation (ChIP) assay.**

570 ChIP was performed as previously described (Yuan et al., 2015). The following  
571 primers were used: Primers: STK38 (5'-CAGCAAGCAACTCACCAGAG-3',  
572 5'-TCCTGTTGTCCTCACCCGTA-3'), BMPR2  
573 (5'-TTTGTGTCTGGTCTGCTCGG-3', 5'-GCACTTCCAGTGGCTCCG-3'). The  
574 percentage of immunoprecipitated DNA relative to the input was calculated and is  
575 shown as the mean  $\pm$  SD from three independent experiments.

#### 576 **Luciferase Assay**

577 To generate the pGL3-STK38-P luciferase reporter, 1.2 kb of DNA upstream the  
578 STK38 TTS promoter region with ZNF611 binding motif was amplified by  
579 polymerase chain reaction (PCR) and cloned into the Firefly luciferase reporter  
580 plasmid pGL3-Basic (Promega) using KPN1 and XHO1 restriction sites. 0.7 kb of  
581 DNA upstream the STK38 TTS promoter region without ZNF611 binding motif was  
582 cloned into pGL3-Basic using same restriction sites to generate the pGL3-STK38- $\Delta$ P  
583 luciferase reporter. HEK293T cells seeded on 48-well plates were incubated until 60%  
584 to 70% confluence and then were transiently transfected with 0.01  $\mu$ g pGL3-STK38  
585 plasmid using Lipofectamine 2000 (Invitrogen, CA, USA). After transfection 36-48 h,  
586 cell lysates were collected for Luciferase activity determination by Dual Luciferase  
587 Reporter assay systems (Promega). According to the manufacturer's instructions,  
588 luciferase activity was normalized by Renilla activity to standardize transfection  
589 efficiency.

#### 590 **Authors' contributions**

591 DY conceived, designed the study, revised the manuscript and supported the  
592 funding needed in this study. CT designed the experiments, partly supported the  
593 funding needed in this study and partly wrote the manuscript. FH partly designed the  
594 study, gave valuable suggestions, and partly supported the funding needed in this  
595 study. PS designed, carried out most of the analyses, and wrote the draft manuscript.  
596 QZ performed most of the experiments, and partly wrote the draft manuscript. AX,  
597 CG, YH participated in part of analyses. JL participated in part of experiments. All  
598 authors read and approved the final manuscript.

### 599 **Acknowledgements**

600 Thanks for the support and help of bioinformatics platform of National Center for  
601 Protein Sciences (Beijing) in omics data processing.

### 602 **Competing interests**

603 The authors declare that they have no competing interests.

### 604 **References**

- 605 Baudat, F., Buard, J., Grey, C., Fledel-Alon, A., Ober, C., Przeworski, M., . . . de  
606 Massy, B. (2010). PRDM9 is a major determinant of meiotic recombination  
607 hotspots in humans and mice. *Science*, *327*(5967), 836-840.  
608 doi:10.1126/science.1183439
- 609 Behringer, R. R., Eakin, G. S., & Renfree, M. B. (2006). Mammalian diversity:  
610 gametes, embryos and reproduction. *Reprod Fertil Dev*, *18*(1-2), 99-107.  
611 doi:10.1071/rd05137
- 612 Birtle, Z., & Ponting, C. P. (2006). Meisetz and the birth of the KRAB motif.  
613 *Bioinformatics*, *22*(23), 2841-2845. doi:10.1093/bioinformatics/btl498
- 614 Cardoso-Moreira, M., Halbert, J., Valloton, D., Velten, B., Chen, C., Shao, Y., . . .  
615 Kaessmann, H. (2019). Gene expression across mammalian organ  
616 development. *Nature*, *571*(7766), 505-509. doi:10.1038/s41586-019-1338-5
- 617 Cassa, C. A., Weghorn, D., Balick, D. J., Jordan, D. M., Nusinow, D., Samocha, K.  
618 E., . . . Sunyaev, S. R. (2017). Estimating the selective effects of heterozygous  
619 protein-truncating variants from human exome data. *Nature Genetics*, *49*(5),  
620 806-810. doi:10.1038/ng.3831
- 621 Chen, W., Schwalie, P. C., Pankevich, E. V., Gubelmann, C., Raghav, S. K., Dainese,  
622 R., . . . Deplancke, B. (2019). ZFP30 promotes adipogenesis through the

- 623 KAP1-mediated activation of a retrotransposon-derived Pparg2 enhancer. *Nat*  
624 *Commun*, 10(1), 1809. doi:10.1038/s41467-019-09803-9
- 625 Consortium, E. P. (2012). An integrated encyclopedia of DNA elements in the human  
626 genome. *Nature*, 489(7414), 57-74. doi:10.1038/nature11247
- 627 Csizmok, V., Follis, A. V., Kriwacki, R. W., & Forman-Kay, J. D. (2016). Dynamic  
628 Protein Interaction Networks and New Structural Paradigms in Signaling.  
629 *Chem Rev*, 116(11), 6424-6462. doi:10.1021/acs.chemrev.5b00548
- 630 Dickinson, M. E., Flenniken, A. M., Ji, X., Teboul, L., Wong, M. D., White, J. K., . . .  
631 Murray, S. A. (2016). High-throughput discovery of novel developmental  
632 phenotypes. *Nature*, 537(7621), 508-514. doi:10.1038/nature19356
- 633 Dosztanyi, Z. (2018). Prediction of protein disorder based on IUPred. *Protein Sci*,  
634 27(1), 331-340. doi:10.1002/pro.3334
- 635 Ecco, G., Cassano, M., Kauzlaric, A., Duc, J., Coluccio, A., Offner, S., . . . Trono, D.  
636 (2016). Transposable Elements and Their KRAB-ZFP Controllers Regulate  
637 Gene Expression in Adult Tissues. *Dev Cell*, 36(6), 611-623.  
638 doi:10.1016/j.devcel.2016.02.024
- 639 Ecco, G., Imbeault, M., & Trono, D. (2017). KRAB zinc finger proteins. *Development*,  
640 144(15), 2719-2729. doi:10.1242/dev.132605
- 641 Eddy, S. R. (2009). A new generation of homology search tools based on probabilistic  
642 inference. *Genome Inform*, 23(1), 205-211.
- 643 Emerson, R. O., & Thomas, J. H. (2009). Adaptive evolution in zinc finger  
644 transcription factors. *PLoS Genet*, 5(1), e1000325.  
645 doi:10.1371/journal.pgen.1000325
- 646 Enomoto, A., Kido, N., Ito, M., Morita, A., Matsumoto, Y., Takamatsu, N., . . .  
647 Miyagawa, K. (2008). Negative regulation of MEKK1/2 signaling by  
648 serine-threonine kinase 38 (STK38). *Oncogene*, 27(13), 1930-1938.  
649 doi:10.1038/sj.onc.1210828
- 650 Feng, J., Liu, T., Qin, B., Zhang, Y., & Liu, X. S. (2012). Identifying ChIP-seq  
651 enrichment using MACS. *Nat Protoc*, 7(9), 1728-1740.  
652 doi:10.1038/nprot.2012.101
- 653 Finn, R. D., Mistry, J., Tate, J., Coggill, P., Heger, A., Pollington, J. E., . . . Bateman,  
654 A. (2010). The Pfam protein families database. *Nucleic Acids Res*,  
655 38(Database issue), D211-222. doi:10.1093/nar/gkp985
- 656 Grey, C., Barthes, P., Chauveau-Le Friec, G., Langa, F., Baudat, F., & de Massy, B.  
657 (2011). Mouse PRDM9 DNA-binding specificity determines sites of histone  
658 H3 lysine 4 trimethylation for initiation of meiotic recombination. *PLoS Biol*,  
659 9(10), e1001176. doi:10.1371/journal.pbio.1001176
- 660 Grey, C., Baudat, F., & de Massy, B. (2018). PRDM9, a driver of the genetic map.  
661 *PLoS Genet*, 14(8), e1007479. doi:10.1371/journal.pgen.1007479
- 662 Guo, Y., Zhang, X., Huang, J., Zeng, Y., Liu, W., Geng, C., . . . He, F. (2009).  
663 Relationships between hematopoiesis and hepatogenesis in the midtrimester  
664 fetal liver characterized by dynamic transcriptomic and proteomic profiles.

- 665 *PLoS One*, 4(10), e7641. doi:10.1371/journal.pone.0007641
- 666 Hamilton, A. T., Huntley, S., Tran-Gyamfi, M., Baggott, D. M., Gordon, L., & Stubbs,  
667 L. (2006). Evolutionary expansion and divergence in the ZNF91 subfamily of  
668 primate-specific zinc finger genes. *Genome Res*, 16(5), 584-594.  
669 doi:10.1101/gr.4843906
- 670 Helleboid, P. Y., Heusel, M., Duc, J., Piot, C., Thorball, C. W., Coluccio, A., . . . Trono,  
671 D. (2019). The interactome of KRAB zinc finger proteins reveals the  
672 evolutionary history of their functional diversification. *EMBO J*, e101220.  
673 doi:10.15252/embj.2018101220
- 674 Herrero, J., Muffato, M., Beal, K., Fitzgerald, S., Gordon, L., Pignatelli, M., . . .  
675 Flicek, P. (2016). Ensembl comparative genomics resources. *Database*  
676 (*Oxford*), 2016. doi:10.1093/database/baw053
- 677 Huntley, S., Baggott, D. M., Hamilton, A. T., Tran-Gyamfi, M., Yang, S., Kim, J., . . .  
678 Stubbs, L. (2006). A comprehensive catalog of human KRAB-associated zinc  
679 finger genes: insights into the evolutionary history of a large family of  
680 transcriptional repressors. *Genome Res*, 16(5), 669-677.  
681 doi:10.1101/gr.4842106
- 682 Imbeault, M., Helleboid, P. Y., & Trono, D. (2017). KRAB zinc-finger proteins  
683 contribute to the evolution of gene regulatory networks. *Nature*, 543(7646),  
684 550-554. doi:10.1038/nature21683
- 685 Jacobs, F. M., Greenberg, D., Nguyen, N., Haeussler, M., Ewing, A. D., Katzman,  
686 S., . . . Haussler, D. (2014). An evolutionary arms race between KRAB  
687 zinc-finger genes ZNF91/93 and SVA/L1 retrotransposons. *Nature*, 516(7530),  
688 242-245. doi:10.1038/nature13760
- 689 Jurka, J. (2000). Repbase update: a database and an electronic journal of repetitive  
690 elements. *Trends Genet*, 16(9), 418-420.
- 691 Kang, S., Akerblad, P., Kiviranta, R., Gupta, R. K., Kajimura, S., Griffin, M. J., . . .  
692 Rosen, E. D. (2012). Regulation of early adipose commitment by Zfp521.  
693 *PLoS Biol*, 10(11), e1001433. doi:10.1371/journal.pbio.1001433
- 694 Keilwagen, J., Posch, S., & Grau, J. (2019). Accurate prediction of cell type-specific  
695 transcription factor binding. *Genome Biol*, 20(1), 9.  
696 doi:10.1186/s13059-018-1614-y
- 697 Kim, D., Langmead, B., & Salzberg, S. L. (2015). HISAT: a fast spliced aligner with  
698 low memory requirements. *Nat Methods*, 12(4), 357-360.  
699 doi:10.1038/nmeth.3317
- 700 Kinsella, R. J., Kahari, A., Haider, S., Zamora, J., Proctor, G., Spudich, G., . . . Flicek,  
701 P. (2011). Ensembl BioMarts: a hub for data retrieval across taxonomic space.  
702 *Database (Oxford)*, 2011, bar030. doi:10.1093/database/bar030
- 703 Kumar, S., Stecher, G., Li, M., Knyaz, C., & Tamura, K. (2018). MEGA X: Molecular  
704 Evolutionary Genetics Analysis across Computing Platforms. *Mol Biol Evol*,  
705 35(6), 1547-1549. doi:10.1093/molbev/msy096
- 706 Kumar, S., Stecher, G., Suleski, M., & Heddes, S. B. (2017). TimeTree: A Resource

- 707 for Timelines, Timetrees, and Divergence Times. *Mol Biol Evol*, 34(7),  
708 1812-1819. doi:10.1093/molbev/msx116
- 709 Kummerfeld, S. K., & Teichmann, S. A. (2006). DBD: a transcription factor  
710 prediction database. *Nucleic Acids Res*, 34(Database issue), D74-81.  
711 doi:10.1093/nar/gkj131
- 712 Larkin, M. A., Blackshields, G., Brown, N. P., Chenna, R., McGettigan, P. A.,  
713 McWilliam, H., . . . Higgins, D. G. (2007). Clustal W and Clustal X version  
714 2.0. *Bioinformatics*, 23(21), 2947-2948. doi:10.1093/bioinformatics/btm404
- 715 Li, H., Quang, D., & Guan, Y. (2019). Anchor: trans-cell type prediction of  
716 transcription factor binding sites. *Genome Res*, 29(2), 281-292.  
717 doi:10.1101/gr.237156.118
- 718 Li, X., Ito, M., Zhou, F., Youngson, N., Zuo, X., Leder, P., & Ferguson-Smith, A. C.  
719 (2008). A maternal-zygotic effect gene, *Zfp57*, maintains both maternal and  
720 paternal imprints. *Dev Cell*, 15(4), 547-557. doi:10.1016/j.devcel.2008.08.014
- 721 Liu, F., Ventura, F., Doody, J., & Massague, J. (1995). Human type II receptor for  
722 bone morphogenic proteins (BMPs): extension of the two-kinase receptor  
723 model to the BMPs. *Mol Cell Biol*, 15(7), 3479-3486.  
724 doi:10.1128/mcb.15.7.3479
- 725 Looman, C., Abrink, M., Mark, C., & Hellman, L. (2002). KRAB zinc finger proteins:  
726 an analysis of the molecular mechanisms governing their increase in numbers  
727 and complexity during evolution. *Mol Biol Evol*, 19(12), 2118-2130.  
728 doi:10.1093/oxfordjournals.molbev.a004037
- 729 Ludwig, T. E., Bergendahl, V., Levenstein, M. E., Yu, J., Probasco, M. D., & Thomson,  
730 J. A. (2006). Feeder-independent culture of human embryonic stem cells. *Nat*  
731 *Methods*, 3(8), 637-646. doi:10.1038/nmeth902
- 732 Mosca, R., Pache, R. A., & Aloy, P. (2012). The role of structural disorder in the  
733 rewiring of protein interactions through evolution. *Mol Cell Proteomics*, 11(7),  
734 M111 014969. doi:10.1074/mcp.M111.014969
- 735 Najafabadi, H. S., Albu, M., & Hughes, T. R. (2015). Identification of C2H2-ZF  
736 binding preferences from ChIP-seq data using RCADE. *Bioinformatics*,  
737 31(17), 2879-2881. doi:10.1093/bioinformatics/btv284
- 738 Nowick, K., Carneiro, M., & Faria, R. (2013). A prominent role of KRAB-ZNF  
739 transcription factors in mammalian speciation? *Trends Genet*, 29(3), 130-139.  
740 doi:10.1016/j.tig.2012.11.007
- 741 Nowick, K., Fields, C., Gernat, T., Caetano-Anolles, D., Kholina, N., & Stubbs, L.  
742 (2011). Gain, loss and divergence in primate zinc-finger genes: a rich resource  
743 for evolution of gene regulatory differences between species. *PLoS One*, 6(6),  
744 e21553. doi:10.1371/journal.pone.0021553
- 745 Oleksiewicz, U., Gladych, M., Raman, A. T., Heyn, H., Mereu, E., Chlebanowska,  
746 P., . . . Wiznerowicz, M. (2017). TRIM28 and Interacting KRAB-ZNFs  
747 Control Self-Renewal of Human Pluripotent Stem Cells through Epigenetic  
748 Repression of Pro-differentiation Genes. *Stem Cell Reports*, 9(6), 2065-2080.



- 749 doi:10.1016/j.stemcr.2017.10.031
- 750 Patel, A., Yang, P., Tinkham, M., Pradhan, M., Sun, M. A., Wang, Y., . . . Cheng, X.  
751 (2018). DNA Conformation Induces Adaptable Binding by Tandem Zinc  
752 Finger Proteins. *Cell*, *173*(1), 221-233 e212. doi:10.1016/j.cell.2018.02.058
- 753 Patro, R., Duggal, G., Love, M. I., Irizarry, R. A., & Kingsford, C. (2017). Salmon  
754 provides fast and bias-aware quantification of transcript expression. *Nat*  
755 *Methods*, *14*(4), 417-419. doi:10.1038/nmeth.4197
- 756 Pontis, J., Planet, E., Offner, S., Turelli, P., Duc, J., Coudray, A., . . . Trono, D. (2019).  
757 Hominoid-Specific Transposable Elements and KZFPs Facilitate Human  
758 Embryonic Genome Activation and Control Transcription in Naive Human  
759 ESCs. *Cell Stem Cell*, *24*(5), 724-735 e725. doi:10.1016/j.stem.2019.03.012
- 760 Ravasi, T., Suzuki, H., Cannistraci, C. V., Katayama, S., Bajic, V. B., Tan, K., . . .  
761 Hayashizaki, Y. (2010). An atlas of combinatorial transcriptional regulation in  
762 mouse and man. *Cell*, *140*(5), 744-752. doi:10.1016/j.cell.2010.01.044
- 763 Riso, V., Cammisa, M., Kukreja, H., Anvar, Z., Verde, G., Sparago, A., . . . Riccio, A.  
764 (2016). ZFP57 maintains the parent-of-origin-specific expression of the  
765 imprinted genes and differentially affects non-imprinted targets in mouse  
766 embryonic stem cells. *Nucleic Acids Res*, *44*(17), 8165-8178.  
767 doi:10.1093/nar/gkw505
- 768 Schmitges, F. W., Radovani, E., Najafabadi, H. S., Barazandeh, M., Campitelli, L. F.,  
769 Yin, Y., . . . Hughes, T. R. (2016). Multiparameter functional diversity of  
770 human C2H2 zinc finger proteins. *Genome Res*, *26*(12), 1742-1752.  
771 doi:10.1101/gr.209643.116
- 772 Sonesson, C., Love, M. I., & Robinson, M. D. (2015). Differential analyses for  
773 RNA-seq: transcript-level estimates improve gene-level inferences. *F1000Res*,  
774 *4*, 1521. doi:10.12688/f1000research.7563.2
- 775 Takahashi, N., Coluccio, A., Thorball, C. W., Planet, E., Shi, H., Offner, S., . . . Trono,  
776 D. (2019). ZNF445 is a primary regulator of genomic imprinting. *Genes Dev*,  
777 *33*(1-2), 49-54. doi:10.1101/gad.320069.118
- 778 Thomas, J. H., & Schneider, S. (2011). Coevolution of retroelements and tandem zinc  
779 finger genes. *Genome Res*, *21*(11), 1800-1812. doi:10.1101/gr.121749.111
- 780 Thurman, R. E., Rynes, E., Humbert, R., Vierstra, J., Maurano, M. T., Haugen, E., . . .  
781 Stamatoyannopoulos, J. A. (2012). The accessible chromatin landscape of the  
782 human genome. *Nature*, *489*(7414), 75-82. doi:10.1038/nature11232
- 783 Tsankov, A. M., Gu, H., Akopian, V., Ziller, M. J., Donaghey, J., Amit, I., . . .  
784 Meissner, A. (2015). Transcription factor binding dynamics during human ES  
785 cell differentiation. *Nature*, *518*(7539), 344-349. doi:10.1038/nature14233
- 786 Vilella, A. J., Severin, J., Ureta-Vidal, A., Heng, L., Durbin, R., & Birney, E. (2009).  
787 EnsemblCompara GeneTrees: Complete, duplication-aware phylogenetic trees  
788 in vertebrates. *Genome Res*, *19*(2), 327-335. doi:10.1101/gr.073585.107
- 789 Watanabe, K., Ueno, M., Kamiya, D., Nishiyama, A., Matsumura, M., Wataya, T., . . .  
790 Sasai, Y. (2007). A ROCK inhibitor permits survival of dissociated human

- 791 embryonic stem cells. *Nat Biotechnol*, 25(6), 681-686. doi:10.1038/nbt1310
- 792 Wolf, D., & Goff, S. P. (2009). Embryonic stem cells use ZFP809 to silence retroviral  
793 DNAs. *Nature*, 458(7242), 1201-1204. doi:10.1038/nature07844
- 794 Wolf, G., Yang, P., Fuchtbauer, A. C., Fuchtbauer, E. M., Silva, A. M., Park, C., . . .  
795 Macfarlan, T. S. (2015). The KRAB zinc finger protein ZFP809 is required to  
796 initiate epigenetic silencing of endogenous retroviruses. *Genes Dev*, 29(5),  
797 538-554. doi:10.1101/gad.252767.114
- 798 Yang, D., Ma, Z., Lin, W., Yang, J., Tian, C., Wei, H., . . . He, F. (2013). Identification  
799 of KAP-1-associated complexes negatively regulating the Ey and beta-major  
800 globin genes in the beta-globin locus. *J Proteomics*, 80C, 132-144.  
801 doi:10.1016/j.jprot.2012.12.014
- 802 Yang, D., Zhong, F., Li, D., Liu, Z., Wei, H., Jiang, Y., & He, F. (2012). General  
803 trends in the utilization of structural factors contributing to biological  
804 complexity. *Mol Biol Evol*, 29(8), 1957-1968. doi:10.1093/molbev/mss064
- 805 Yang, P., Wang, Y., & Macfarlan, T. S. (2017). The Role of KRAB-ZFPs in  
806 Transposable Element Repression and Mammalian Evolution. *Trends Genet*,  
807 33(11), 871-881. doi:10.1016/j.tig.2017.08.006
- 808 Yuan, L., Chen, Z., Song, S., Wang, S., Tian, C., Xing, G., . . . Zhang, L. (2015). p53  
809 degradation by a coronavirus papain-like protease suppresses type I interferon  
810 signaling. *J Biol Chem*, 290(5), 3172-3182. doi:10.1074/jbc.M114.619890
- 811 Zerbino, D. R., Achuthan, P., Akanni, W., Amode, M. R., Barrell, D., Bhai, J., . . .  
812 Flicek, P. (2018). Ensembl 2018. *Nucleic Acids Res*, 46(D1), D754-D761.  
813 doi:10.1093/nar/gkx1098
- 814 Zhang, Y., Liu, T., Meyer, C. A., Eeckhoute, J., Johnson, D. S., Bernstein, B. E., . . .  
815 Liu, X. S. (2008). Model-based analysis of ChIP-Seq (MACS). *Genome Biol*,  
816 9(9), R137. doi:10.1186/gb-2008-9-9-r137
- 817
- 818

819

## 820 **Figure legends**

821 **Fig. 1. Comparison of divergence time of full protein sequence, KRAB domain and zinc**

822 **finger in KZFPs. (A)** Box plots of the divergence time of full protein sequence, KRAB domain

823 and zinc finger in KZFPs. The values of upper and lower quartiles are indicated as upper and

824 lower edges of the box, and the median values of median are indicated as a bar in the box. The

825 differences of divergence time among gene, KRAB domain and zinc finger are examined by

826 Mann–Whitney U test. The corrected P values are shown in the top of the panel. (B–D)

827 Comparison of the three types of divergence time for each KZFP. In each subgraph, there are two

828 dots for every KZFP, representing two types of divergence time. One is above the zero line and the

829 other one is below it. The difference values of the two types of divergence time are shown as

830 broken lines in each subgraph with the right axis as the reference scale. According to the

831 comparison results, KZFPs are divided into three classes for each type of comparison. The

832 numbers and percentages of KZFPs in each class are shown in brackets on the label of X-axis.

833

834 **Fig. 2. Sequence diversification of KRAB domains and zinc fingers in human KZFPs. (A)**

835 The phylogenetic tree of KRAB domain A-boxes in human KZFPs associated with their  
836 corresponding KRAB domain divergence time and zinc finger divergence time shown as heatmap.

837 The variant KRAB domain cluster (right) also are displayed as a zoom-in in this figure. (B) The

838 structural disorder ratio (SDR) values of the variant KRAB domains (vKRAB) and the standard

839 KRAB domains (sKRAB). (C) The SDR values of KRAB domains in KZFPs with different

840 divergence time grades of zinc finger. (D) The similarity values of the key amino acids in zinc

841 fingers of KZFPs. The proportions of the similar zinc fingers (see Method for detail) in each pair

842 KZFPs are defined as the similarity values (0-1) shown in the heatmap. As the number of zinc

843 fingers in two KZFPs can vary significantly, we display the average similarity level. The

844 divergence time of KRAB domain and zinc fingers of each KZFP are shown as heatmap in the

845 bottom of the panel. (E) The histogram of similarity values of the key amino acids in zinc fingers

846 of KZFPs between each KZFP pairs. The KZFP pair number and the percentage with similarity

847 values  $\geq 0.6$  are shown in the figure. (F) The gene number and percentage of paralogous gene and



848 singleton in KZFPs. For box-plots (*B-C*), the values of upper and lower quartiles are indicated as  
849 upper and lower edges of the box, and the median values of median are indicated as a bar in the  
850 box. The differences of SDR values between different categories are examined by Mann–Whitney  
851 U test. The corrected P values are shown in the top of each panel. The abbreviations in the figure:  
852 Am-Th, Amniota-Theria; Eu-Ha, Eutheria-Haplorrhini; Si-Ho, Simiiformes-Homo.

853 **Fig. 3. The tendency of KZFPs binding to non-TE regions and its functional significance.** (*A*)

854 Heatmap showing the percentage of the peaks not overlapping with TE for each KZFP in multiple  
855 types of genomics regions. Each row represents a type o genomic region. Each column represents  
856 a KZFP. All the KZFPs were classified into seven divergence time grades based on the zinc finger  
857 divergence time. The numbers in the left of the panel represent the percentage values of KZFPs  
858 not tending to bind to TE in each type of genomic region. (*B*) The binding bias of KZFPs with  
859 different zinc finger divergence time grades. The peaks mapping within the whole genome and  
860 PCG (protein-coding gene) promoter regions were analyzed. The red dashed line represents 50%.  
861 (*C*), The classification of PCGs into three types: noKZFP PCG, KZFP-TE PCG and KZFP-nonTE  
862 PCG. noKZFP\_PCGs, the PCGs where no KZFP peak binds to their promoters; KZFP-TE\_PCGs,  
863 the PCGs where at least one KZFP peak binds to TEs in their promoters; KZFP-nonTE\_PCGs, the  
864 PCGs where at least one KZFP peak binds to their promoters and all KZFP peaks binding to the  
865 promoters only bind to non-TE regions. (*D*) Over- or under-representation analysis of biological  
866 processes for the three types of PCGs. The over- or under-representation strengths of each class  
867 were represented by  $-\log(p)$  or  $\log(p)$ , respectively and were shown in the heat map. (*E*)  
868 Comparison of the tolerance to functional variation among the three types of PCGs. (*F*) the  
869 comparison of the ratio of nonsynonymous and synonymous distance (dN/dS) among the three  
870 types of PCGs. For the box plots (*B, E, F*), the values of upper and lower quartiles are indicated as  
871 upper and lower edges of the box, and the median values of median are indicated as a bar in the  
872 box.. The differences of expression width between different categories are examined by  
873 Mann–Whitney U test. The corrected P values are shown in the top of each panel.

874

875 **Fig. 4. The correlation between the three types of divergence time and the expression level of**

876 **KZFP genes.** (*A*), left, heatmap showing spearman's rank correlation coefficients between the

877 divergence time of full protein sequence, KRAB domain or zinc finger in KZFPs and the gene  
878 expression level; right, heatmap showing the gene expression level which is classified into 4  
879 grades (H, M, L, U). Each column represents a KZFP. All the KZFPs were classified into seven  
880 classes according to the divergence time of the zinc fingers. Five types of samples are marked as  
881 bars with different colors, including human early embryonic development, three directions of ESC  
882 differentiation and adult organs or tissues. (B) Zoom-in on the expression level of genes encoding  
883 KZFPs with young zinc fingers in early embryo development and early mesoderm differentiation.

884

885 **Fig. 5. The functions of KZFP target genes in the differentiation of ESC into mesoderm.** (A)

886 the percentage of KZFP peaks binding to TEs or non-TE regions within accessible chromatin in  
887 the genome or PCG promoters in ESCs. (B) schematic diagram of the work flow for KZFP target  
888 gene screening (See method for detailed description). (C) the significantly over- or  
889 under-represented biological process terms for the two types of PCGs (KZFP-TE PCGs and  
890 KZFP-nonTE PCGs) in the differentiation of ESC into mesoderm. The over- or  
891 under-representation strengths of each class were represented by  $-\log(p)$  or  $\log(p)$ , respectively  
892 and were shown in the heat map. (D) the tolerance to functional variants between KZFP-TEs and  
893 KZFP-nonTEs in differentiation of ESC into mesoderm. (E) the evolutionary rate of KZFP-TEs  
894 and KZFP-nonTEs in differentiation of ESC into mesoderm. For the box plots (D&E), the values  
895 of upper and lower quartiles are indicated as upper and lower edges of the box, and the median  
896 values of median are indicated as a bar in the box. The differences of the tolerance to functional  
897 variation and the evolutionary rate between different categories are examined by Mann–Whitney  
898 U test. The corrected P values are shown in the top of each panel.

899

900 **Fig. 6. The regulatory and co-evolution relationship between ZNF611, a KZFP containing**

901 **young zinc fingers, and STK38, one of its target genes in ESCs.** (A) Effect of ZNF611  
902 overexpression on the mRNA level of its target genes. Total RNA from ZNF611 transfected ESC  
903 cells was subjected to real-time quantitative PCR (qPCR) analysis. Control: empty vector. (B)  
904 Effect of ZNF611 knockdown on the mRNA level of its target genes. For panel A and B, relative

905 mRNA levels of predicted target genes were normalized to GAPDH. The ratio values (relative  
906 expression level / the averdivergence time control value) were shown. Data are means  $\pm$  SD (n =  
907 3). The differences of expression level between control and KZFP overexpression are assessed by  
908 t-test. \*\*:  $p < 0.01$ , \*:  $p < 0.05$ . (C) Screenshot of ZNF611 binding sites and chromatin  
909 accessibility in ESC and mesoderm at genomic loci corresponding to STK38. (D) ESCs were  
910 transfected with empty vectors or Flag-tagged ZNF611 expression plasmids. After 36 h, cells were  
911 harvested and ChIP assay was performed using antibodies against IgG or Flag, and quantitative  
912 PCR was performed with primer sets against STK38 target promoters, indicating ZNF611  
913 occupancy. Data are represented as means  $\pm$  S.D. (n = 3). All data present results from three  
914 independent experiments. (E) the molecular phylogenetic tree of key amino acids in zinc fingers  
915 of ZNF611 in Simiiformes. The percentage of replicate trees in which the associated taxa clustered  
916 together in the bootstrap test (2000 replicates) are shown next to the branches. The evolutionary  
917 distances were computed using the Poisson correction method and are in the units of the number  
918 of amino acid substitutions per site. (F) ZNF611 binding motif predicted by RACDE. (G)  
919 Alignment of the STK38 promoter locus from 21 representative species. (H) Schematic  
920 representation of STK38 promoter reporter plasmids with or without ZNF611 binding site. (I)  
921 HEK293T cells were transfected with STK38 promoter reporter plasmids, and luciferase activities  
922 were measured and normalized. Representative results of three independent reporter assay  
923 experiments are shown. The data are represented as the mean  $\pm$  S.D. (n = 3). All data present  
924 results from three independent experiments. pGL3-STK38-P: full construct; pGL3-STK38- $\Delta$ P:  
925 ZNF611 binding motif deletion.

926

927 **Fig. 7. The 'two-way model' of KZFP family evolution.** The evolution of the KZFP family is  
928 mainly divided into two directions. One is the divergence of key amino acids in the zinc fingers  
929 (zinc finger array varied). In another evolutionary path, the key amino acids in the zinc fingers are  
930 conserved, but the sequence of KRAB domain is diverged (KRAB domain varied).

931

932

933 **Figure 1**

934

935

936

937

938

939

940

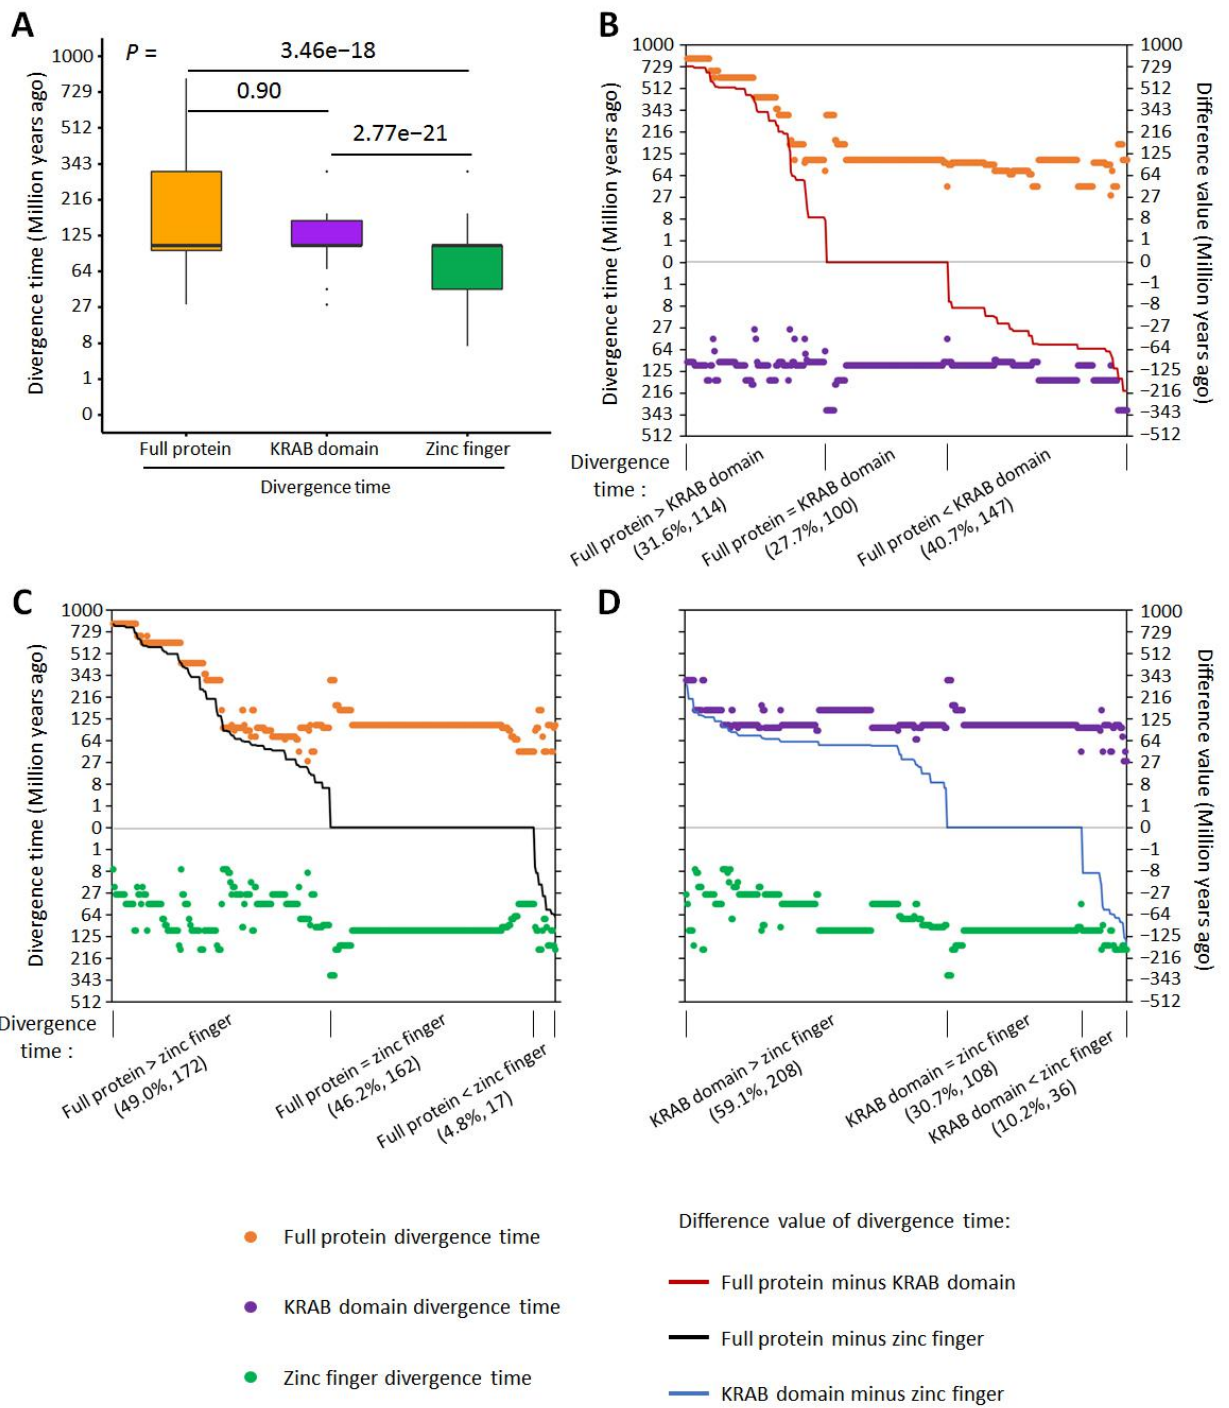

941 **Figure 2**

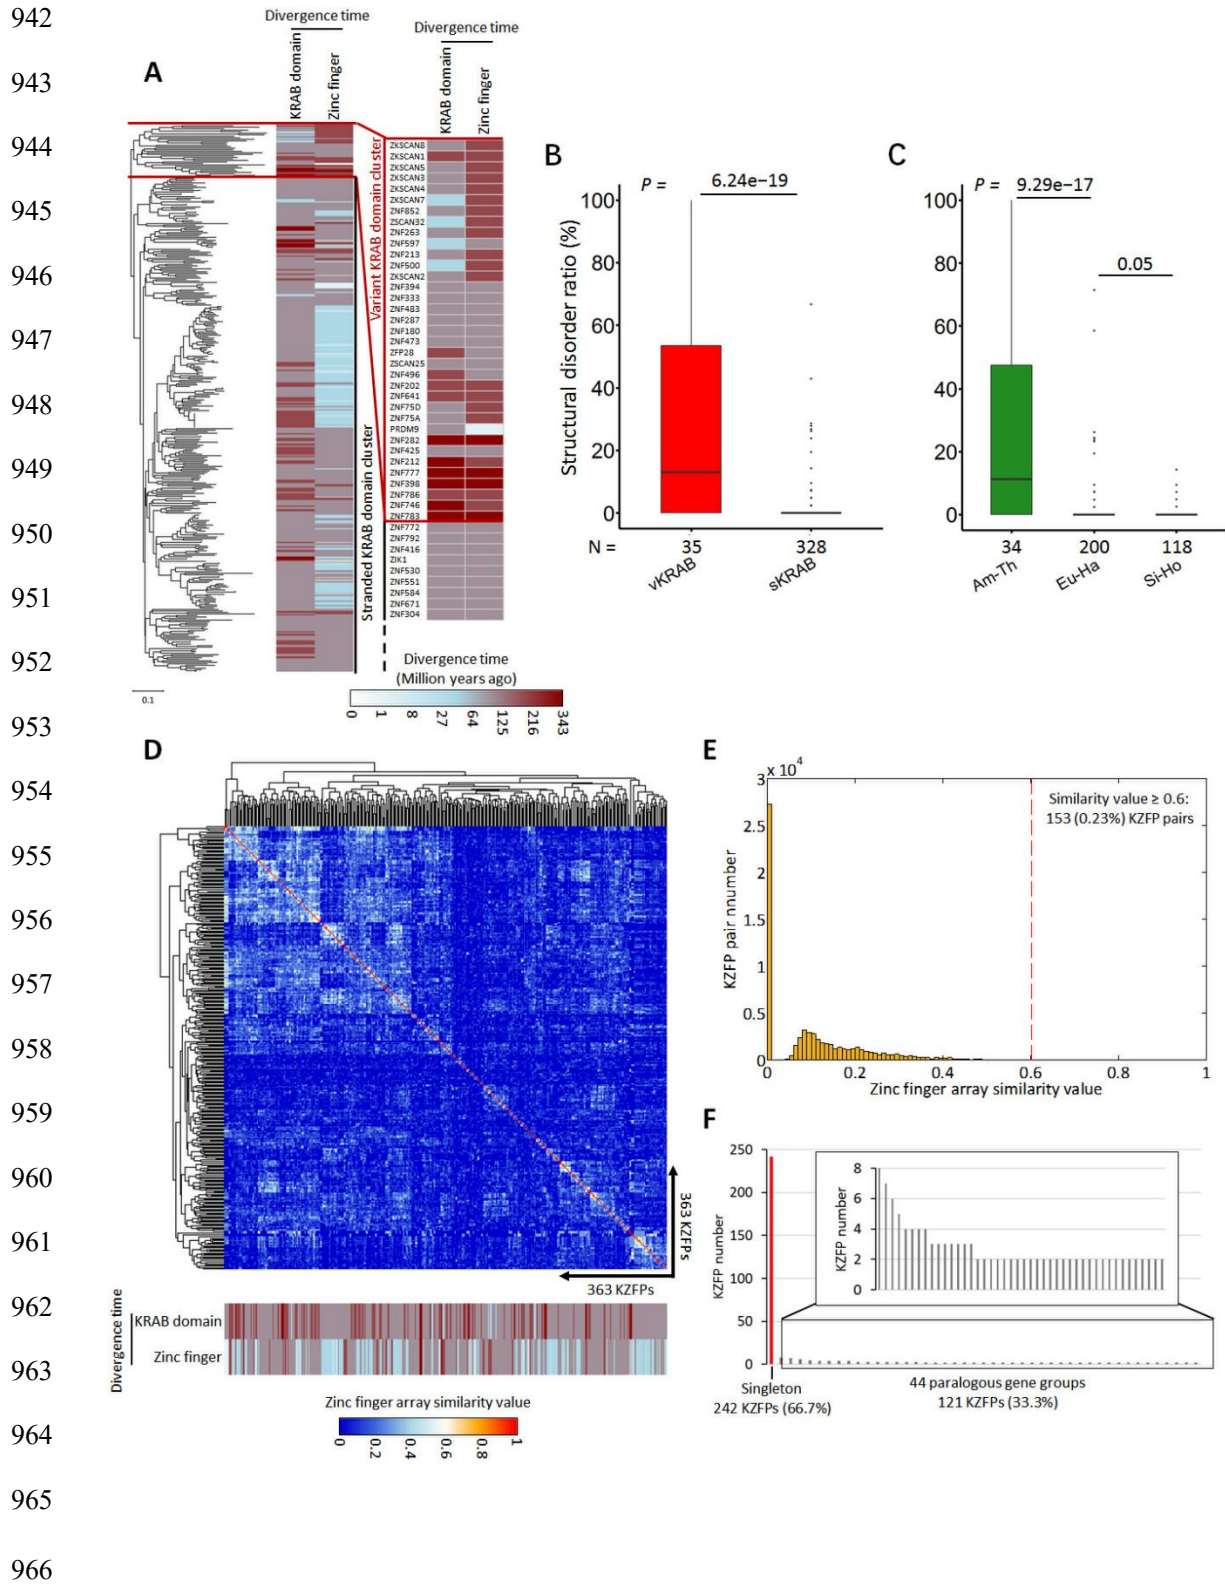



967 **Figure 3**

968

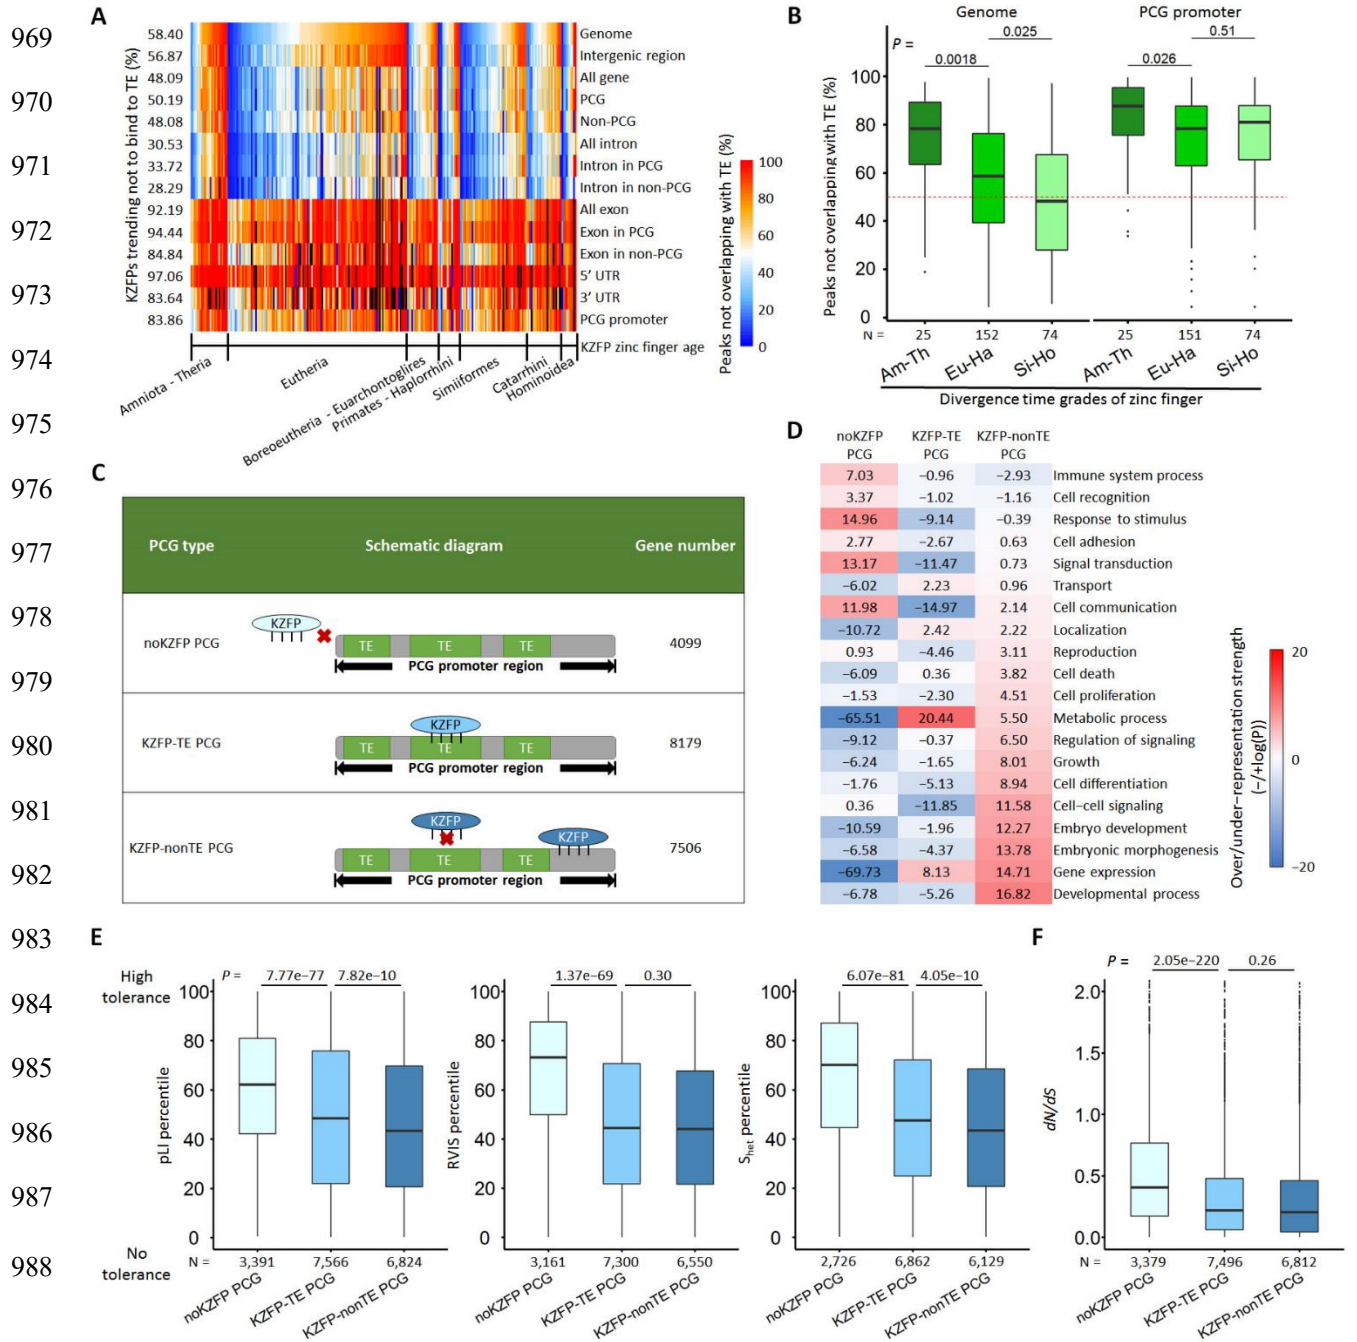

989 **Figure 4**

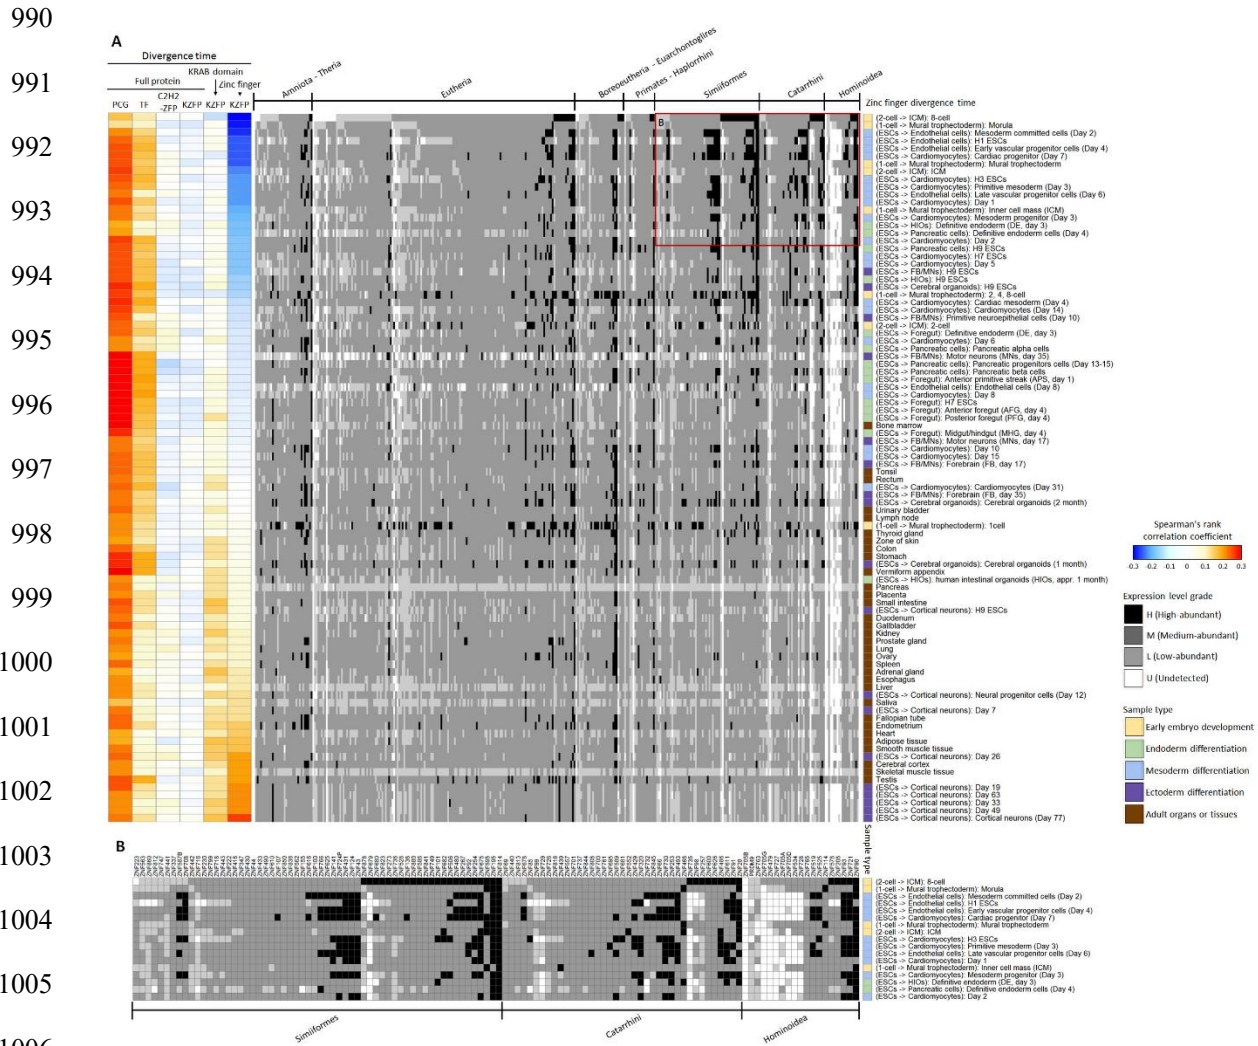

1012 **Figure 5**

1013

1014

1015

1016

1017

1018

1019

1020

1021

1022

1023

1024

1025

1026

1027

1028

1029

1030

1031

1032

1033

1034

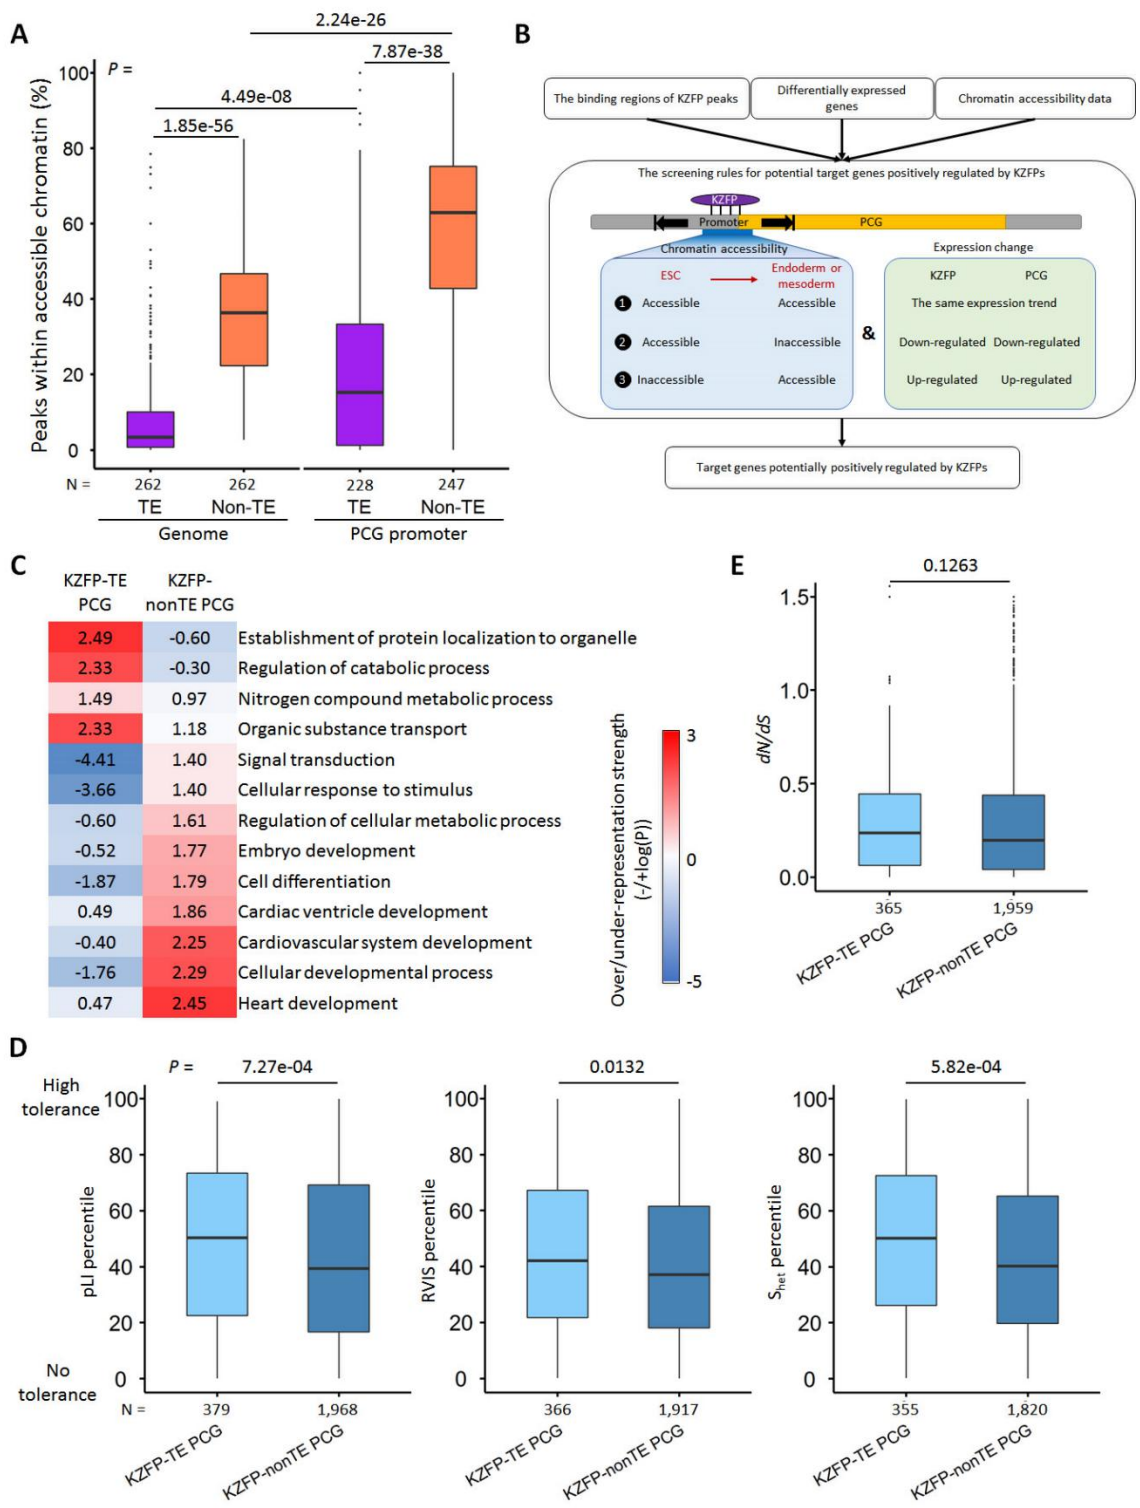



1035 **Figure 6**

1036

1037

1038

1039

1040

1041

1042

1043

1044

1045

1046

1047

1048

1049

1050

1051

1052

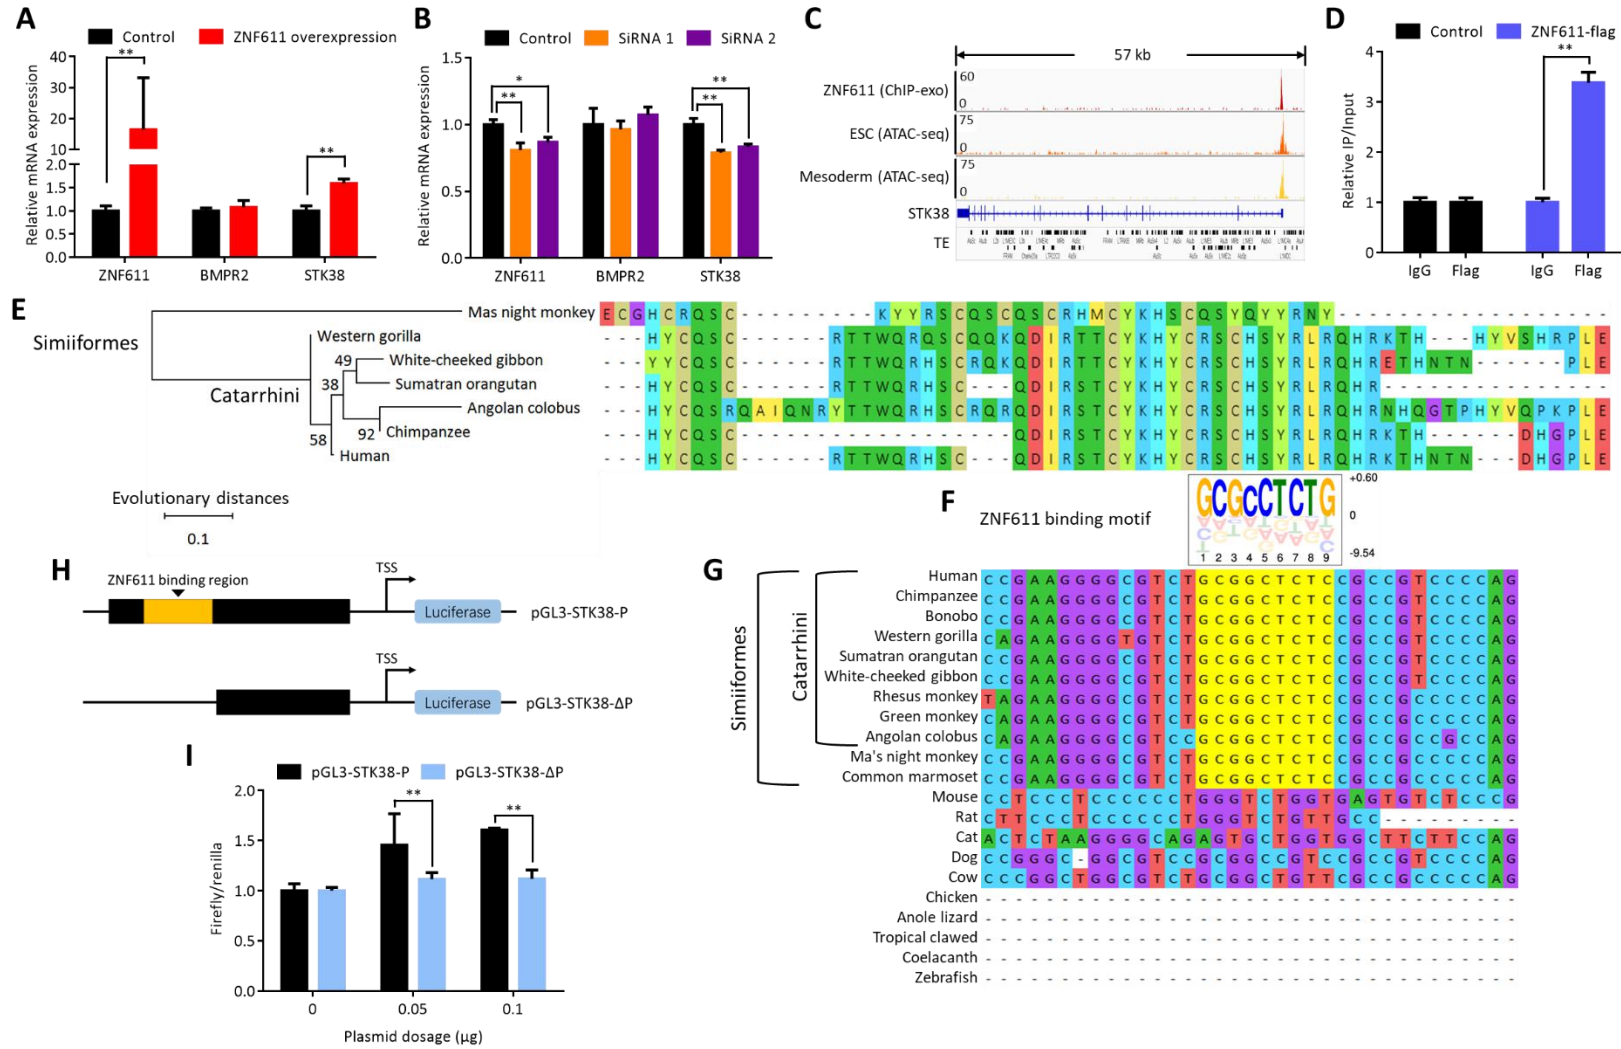

1053

1054 **Figure 7**

1055

1056

1057

1058

1059

1060

1061

1062

1063

1064

1065

1066

1067

1068

1069

1070

1071

1072

1073

1074

1075

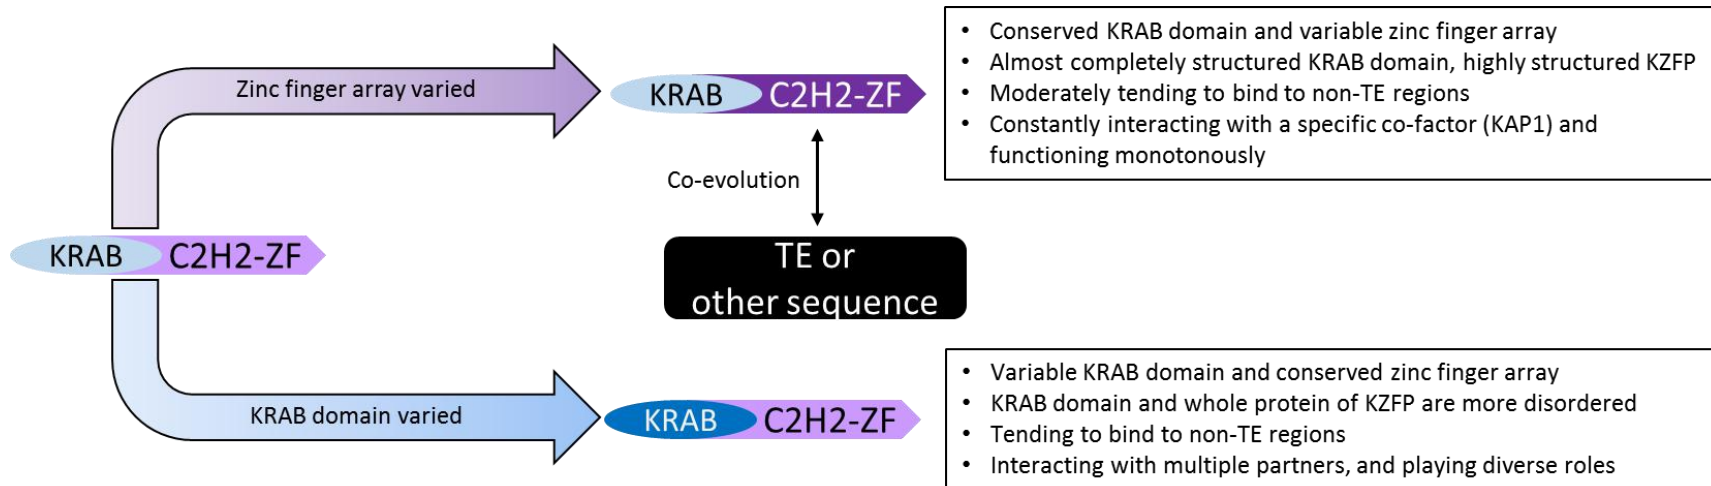

Source: https://www.biorxiv.org/content/biorxiv/early/2020/04/16/2020.04.15.041848.full.pdf
